# Supplementary material
Source: publisher figshare collection journal article supplement (https://acs.figshare.com/ndownloader/files/15479465)
Supplement: Supplementary file 1 [file 15479465]

# An Extreme Case of Swelling of Mostly-*cis* Polydicyclopentadiene by Selective Solvent Absorption - Application in Decontamination and Environmental Remediation

*Despoina Chriti, Grigorios Raptopoulos, George C. Anyfantis, Patrina  
Paraskevopoulou\**

Laboratory of Inorganic Chemistry, Department of Chemistry, National and Kapodistrian  
University of Athens, Panepistimiopolis Zografou, Athens 15771, Greece

\*E-mail: [paraskevopoulou@chem.uoa.gr](mailto:paraskevopoulou@chem.uoa.gr)

## SUPPORTING INFORMATION

## Table of Contents

|                                                                                                               |    |
|---------------------------------------------------------------------------------------------------------------|----|
| <b>Figure S1.</b> FTIR-ATR spectrum of <b>W<sub>2</sub>-PDCPD</b> xerogels.....                               | 6  |
| <b>Figure S2.</b> <sup>13</sup> C CPMAS NMR spectrum of <b>W<sub>2</sub>-PDCPD</b> xerogels.....              | 6  |
| <b>Figure S3.</b> Differential thermogravimetric analysis of <b>W<sub>2</sub>-PDCPD</b> xerogels. ....        | 7  |
| <b>Figure S4.</b> Swelling of a <b>W<sub>2</sub>-PDCPD</b> xerogel in chloroform with time. ....              | 8  |
| <b>Figure S5.</b> Swelling of a <b>W<sub>2</sub>-PDCPD</b> xerogel in bromobenzene with time. ....            | 8  |
| <b>Figure S6.</b> Swelling of a <b>W<sub>2</sub>-PDCPD</b> xerogel in carbon disulfide with time.....         | 9  |
| <b>Figure S7.</b> Swelling of a <b>W<sub>2</sub>-PDCPD</b> xerogel in 1,3-dichlorobenzene with time.....      | 9  |
| <b>Figure S8.</b> Swelling of a <b>W<sub>2</sub>-PDCPD</b> xerogel in carbon tetrachloride with time. ....    | 10 |
| <b>Figure S9.</b> Swelling of a <b>W<sub>2</sub>-PDCPD</b> xerogel in chlorobenzene with time. ....           | 10 |
| <b>Figure S10.</b> Swelling of a <b>W<sub>2</sub>-PDCPD</b> xerogel in 1,2-dibromoethane with time. ....      | 11 |
| <b>Figure S11.</b> Swelling of a <b>W<sub>2</sub>-PDCPD</b> xerogel in tetrahydrofuran with time.....         | 11 |
| <b>Figure S12.</b> Swelling of a <b>W<sub>2</sub>-PDCPD</b> xerogel in benzene with time. ....                | 12 |
| <b>Figure S13.</b> Swelling of a <b>W<sub>2</sub>-PDCPD</b> xerogel in ethyl bromide with time. ....          | 12 |
| <b>Figure S14.</b> Swelling of a <b>W<sub>2</sub>-PDCPD</b> xerogel in 1-bromobutane with time. ....          | 13 |
| <b>Figure S15.</b> Swelling of a <b>W<sub>2</sub>-PDCPD</b> xerogel in methylene dichloride with time.....    | 13 |
| <b>Figure S16.</b> Swelling of a <b>W<sub>2</sub>-PDCPD</b> xerogel in 1,3,5-trimethylbenzene with time. .... | 14 |
| <b>Figure S17.</b> Swelling of a <b>W<sub>2</sub>-PDCPD</b> xerogel in 1,4-dimethylbenzene with time.....     | 14 |
| <b>Figure S18.</b> Swelling of a <b>W<sub>2</sub>-PDCPD</b> xerogel in 1,3-dimethylbenzene with time.....     | 15 |
| <b>Figure S19.</b> Swelling of a <b>W<sub>2</sub>-PDCPD</b> xerogel in 1,2-dichlorobenzene with time.....     | 15 |
| <b>Figure S20.</b> Swelling of a <b>W<sub>2</sub>-PDCPD</b> xerogel in benzyl chloride with time.....         | 16 |
| <b>Figure S21.</b> Swelling of a <b>W<sub>2</sub>-PDCPD</b> xerogel in cyclohexane with time. ....            | 16 |
| <b>Figure S22.</b> Swelling of a <b>W<sub>2</sub>-PDCPD</b> xerogel in 1,4-dioxane with time. ....            | 17 |
| <b>Figure S23.</b> Swelling of a <b>W<sub>2</sub>-PDCPD</b> xerogel in cyclohexanone with time. ....          | 17 |
| <b>Figure S24.</b> Swelling of a <b>W<sub>2</sub>-PDCPD</b> xerogel in 1,2-dichloroethane with time. ....     | 18 |

|                                                                                                                                                                                                                                                                                                                                                                                                                                                                                                                                                                                                                                                                                                                                                                                   |           |
|-----------------------------------------------------------------------------------------------------------------------------------------------------------------------------------------------------------------------------------------------------------------------------------------------------------------------------------------------------------------------------------------------------------------------------------------------------------------------------------------------------------------------------------------------------------------------------------------------------------------------------------------------------------------------------------------------------------------------------------------------------------------------------------|-----------|
| <b>Figure S25.</b> Swelling of a <b>W<sub>2</sub>-PDCPD</b> xerogel in pyridine with time. ....                                                                                                                                                                                                                                                                                                                                                                                                                                                                                                                                                                                                                                                                                   | <b>18</b> |
| <b>Figure S26.</b> Swelling of a <b>W<sub>2</sub>-PDCPD</b> xerogel in bromobenzene. ....                                                                                                                                                                                                                                                                                                                                                                                                                                                                                                                                                                                                                                                                                         | <b>19</b> |
| <b>Figure S27.</b> Swelling of a <b>W<sub>2</sub>-PDCPD</b> xerogel in carbon disulfide. ....                                                                                                                                                                                                                                                                                                                                                                                                                                                                                                                                                                                                                                                                                     | <b>19</b> |
| <b>Figure S28.</b> Swelling of a <b>W<sub>2</sub>-PDCPD</b> xerogel in 1,2-dibromoethane. ....                                                                                                                                                                                                                                                                                                                                                                                                                                                                                                                                                                                                                                                                                    | <b>19</b> |
| <b>Figure S29.</b> Swelling of a <b>W<sub>2</sub>-PDCPD</b> xerogel in 1,3,5-trimethylbenzene. ....                                                                                                                                                                                                                                                                                                                                                                                                                                                                                                                                                                                                                                                                               | <b>20</b> |
| <b>Figure S30.</b> Swelling of a <b>W<sub>2</sub>-PDCPD</b> xerogel in 1,4-dimethylbenzene. ....                                                                                                                                                                                                                                                                                                                                                                                                                                                                                                                                                                                                                                                                                  | <b>20</b> |
| <b>Figure S31.</b> Swelling of a <b>W<sub>2</sub>-PDCPD</b> xerogel in 1,3-dimethylbenzene. ....                                                                                                                                                                                                                                                                                                                                                                                                                                                                                                                                                                                                                                                                                  | <b>20</b> |
| <b>Figure S32.</b> Swelling of a <b>W<sub>2</sub>-PDCPD</b> xerogel in benzyl chloride. ....                                                                                                                                                                                                                                                                                                                                                                                                                                                                                                                                                                                                                                                                                      | <b>21</b> |
| <b>Figure S33.</b> Swelling of a <b>W<sub>2</sub>-PDCPD</b> xerogel in 1,4-dioxane. ....                                                                                                                                                                                                                                                                                                                                                                                                                                                                                                                                                                                                                                                                                          | <b>21</b> |
| <b>Figure S34.</b> Relation between the experimental maximum volume degree of swelling ( $q_{\max}$ ) of <b>W<sub>2</sub>-PDCPD</b> xerogels and the Hansen Solubility Parameters (HSP): total solubility parameter ( $\delta_T$ , a), D-component ( $\delta_D$ , b), P-component ( $\delta_P$ , c) and H-component ( $\delta_H$ , d) of the respective solvents. ....                                                                                                                                                                                                                                                                                                                                                                                                            | <b>25</b> |
| <b>Figure S35.</b> 3D plot of the individual Hansen Solubility Parameters (HSP) for each solvent tested. Blue dots represent solvents in which <b>W<sub>2</sub>-PDCPD</b> xerogels swelled (23 “good” solvents – score: “1”). Red squares represent solvents in which no swelling was observed (21 “bad” solvents – score: “0”). The green sphere, generated by the HSPiP 5.1.02 software, is the sphere with the minimum diameter that fits best the experimental data. The center of the sphere is a reasonable estimate of the HSP of <b>W<sub>2</sub>-PDCPD</b> , which is represented by the green dot. The sphere contains all “good” solvents and no “bad” solvents (referred to as wrong solvents), giving a fit value of 1.0, which is considered as a perfect fit. .... | <b>28</b> |
| <b>Figure S36.</b> 2D projections, generated by the HSPiP 5.1.02 software, of the individual Hansen Solubility Parameters (HSP) for each solvent tested at the three planes of the cube inscribing the sphere of Figure S35, as indicated. Blue dots represent solvents in which <b>W<sub>2</sub>-PDCPD</b> xerogels swelled (“good” solvents). Red squares represent solvents in which no swelling was observed (“bad” solvents). The green dot represents <b>W<sub>2</sub>-PDCPD</b> itself. The green circle contains all “good” solvents. ....                                                                                                                                                                                                                                | <b>28</b> |
| <b>Figure S37.</b> 2D projections, generated by the HSPiP 5.1.02 software, of the individual Hansen Solubility Parameters (HSP) for each solvent tested at the three planes of the cube inscribing the                                                                                                                                                                                                                                                                                                                                                                                                                                                                                                                                                                            |           |

sphere of Figure 5 of the manuscript, as indicated. Blue dots represent solvents in which **W<sub>2</sub>-PDCPD** xerogels swelled (“good” solvents). Red squares represent solvents in which no swelling was observed (“bad” solvents). The green dot represents **W<sub>2</sub>-PDCPD** itself. The green circle contains all “good” solvents. .... 29

**Figure S38.** Calculation of the Hansen Solubility Parameters (HSP) of dicyclopentadiene (DCPD) using the DIY method of the HSPiP 5.1.02 software. .... 29

**Figure S39.** Same as Figure 5 of the manuscript, showing also the location of dicyclopentadiene (DCPD; orange dot; RED = 0.438). .... 30

**Figure S40.** 2D plots of the magnitude differences between the solvent and **W<sub>2</sub>-PDCPD** xerogels:  $\Delta\delta_P$  vs  $\Delta 2\delta_D$  (a) and  $\Delta\delta_H$  vs  $\Delta 2\delta_D$  (b). Green dot shows point (0,0). .... 32

**Figure S41.** Separation of methylene dichloride (dyed with Sudan blue) from water using **W<sub>2</sub>-PDCPD** xerogels. .... 33

**Figure S42.** Separation of chlorobenzene (dyed with Sudan blue) from water using **W<sub>2</sub>-PDCPD** xerogels. .... 33

**Figure S43.** Separation of 1,3-dichlorobenzene (dyed with Sudan blue) from water using **W<sub>2</sub>-PDCPD** xerogels. .... 33

**Figure S44.** Separation of benzyl chloride (dyed with Sudan blue) from water using **W<sub>2</sub>-PDCPD** xerogels. .... 34

**Figure S45.** Separation of tetrahydrofuran from water using **W<sub>2</sub>-PDCPD** xerogels. .... 34

**Figure S46.** Separation of toluene from oil using **W<sub>2</sub>-PDCPD** xerogels. .... 34

**Figure S47.** Separation of toluene from hexane using **W<sub>2</sub>-PDCPD** xerogels. .... 35

|                                                                                                                                                                                                                                                                                                                                                 |           |
|-------------------------------------------------------------------------------------------------------------------------------------------------------------------------------------------------------------------------------------------------------------------------------------------------------------------------------------------------|-----------|
| <b>Table S1.</b> Solvent uptake and density of <b>W<sub>2</sub>-PDCPD</b> xerogels and other materials from the literature, for comparison purposes. ....                                                                                                                                                                                       | <b>23</b> |
| <b>Table S2.</b> Experimental maximum volume degree of swelling ( $q_{\max}$ ) of <b>W<sub>2</sub>-PDCPD</b> xerogels in various solvents; Hansen Solubility Parameters (HSP), <sup>24</sup> molar volume ( $V_m$ ) <sup>24</sup> and surface tension ( $\gamma$ ) of the solvents used in this study. ....                                     | <b>24</b> |
| <b>Table S3.</b> Experimental maximum volume degree of swelling ( $q_{\max}$ ) of <b>W<sub>2</sub>-PDCPD</b> xerogels in various solvents, Hansen Solubility Parameters (HSP) of the solvents, <sup>24</sup> scoring according to whether they are “good” (“1”) or “bad” (“0”) solvents, and calculated Relative Energy Differences (RED). .... | <b>27</b> |
| <b>Table S4.</b> Calculated Hansen Solubility Parameters (HSP) of <b>W<sub>2</sub>-PDCPD</b> xerogels and solvents. ....                                                                                                                                                                                                                        | <b>31</b> |

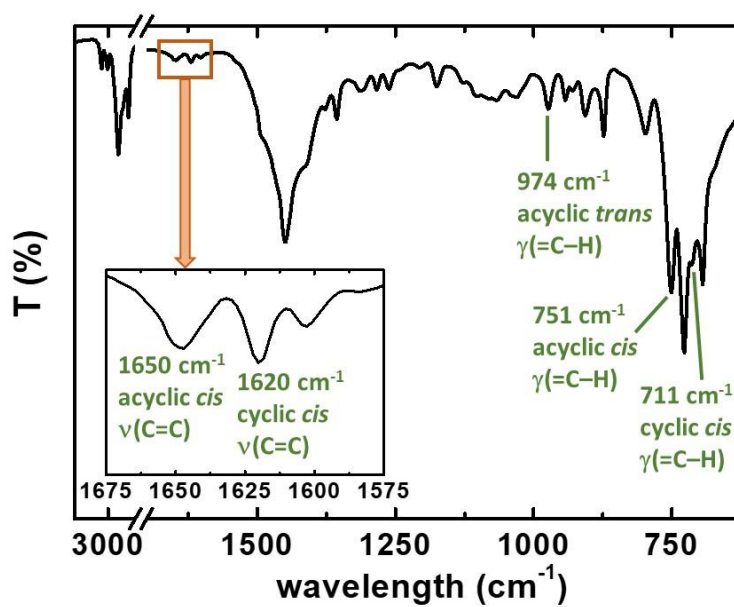

Figure S1. FTIR-ATR spectrum of  $W_2$ -PDCPD xerogels.

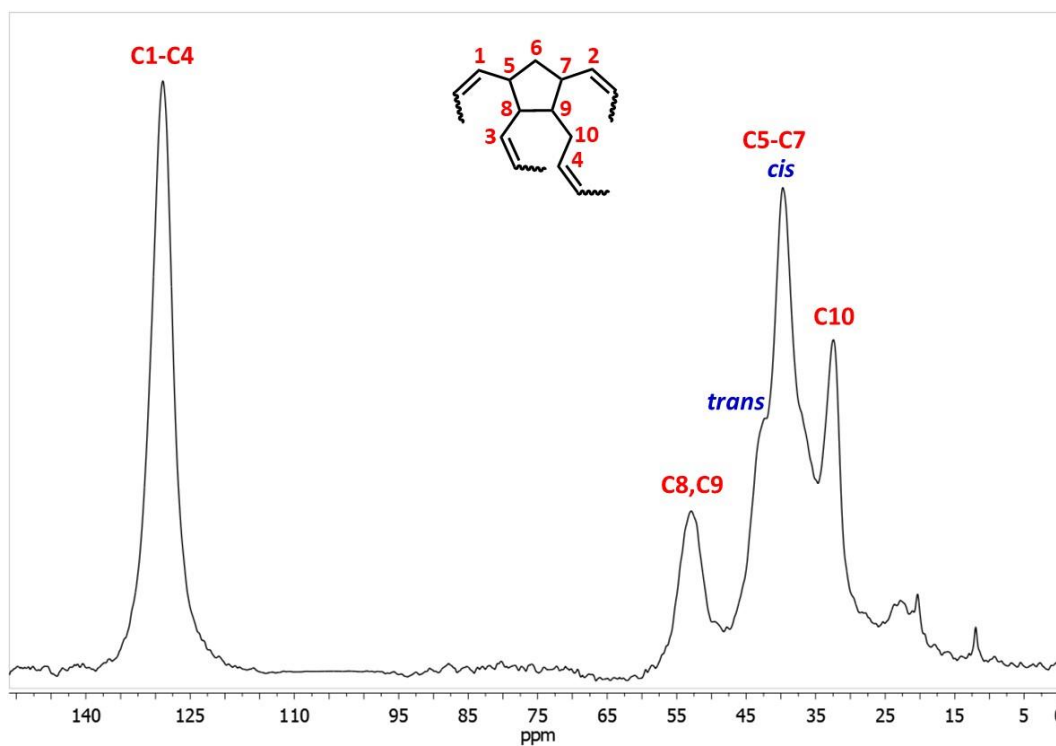

Figure S2.  $^{13}C$  CPMAS NMR spectrum of  $W_2$ -PDCPD xerogels.

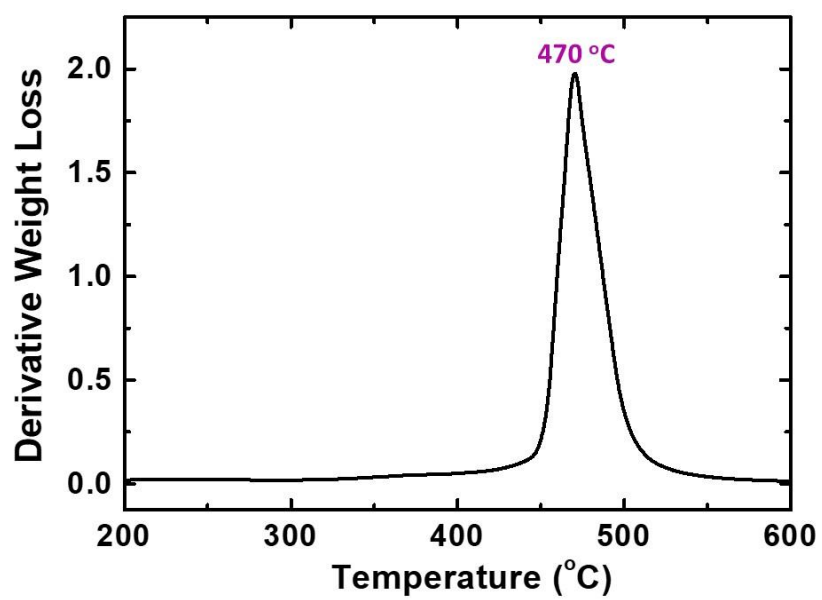

**Figure S3.** Differential thermogravimetric analysis of **W<sub>2</sub>-PDCPD** xerogels.

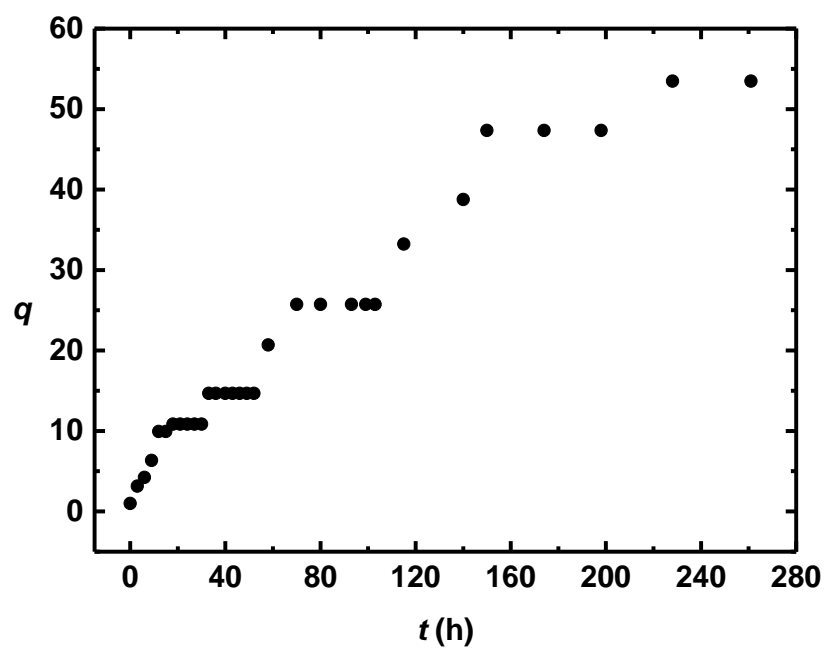

**Figure S4.** Swelling of a **W<sub>2</sub>-PDCPD** xerogel in chloroform with time.

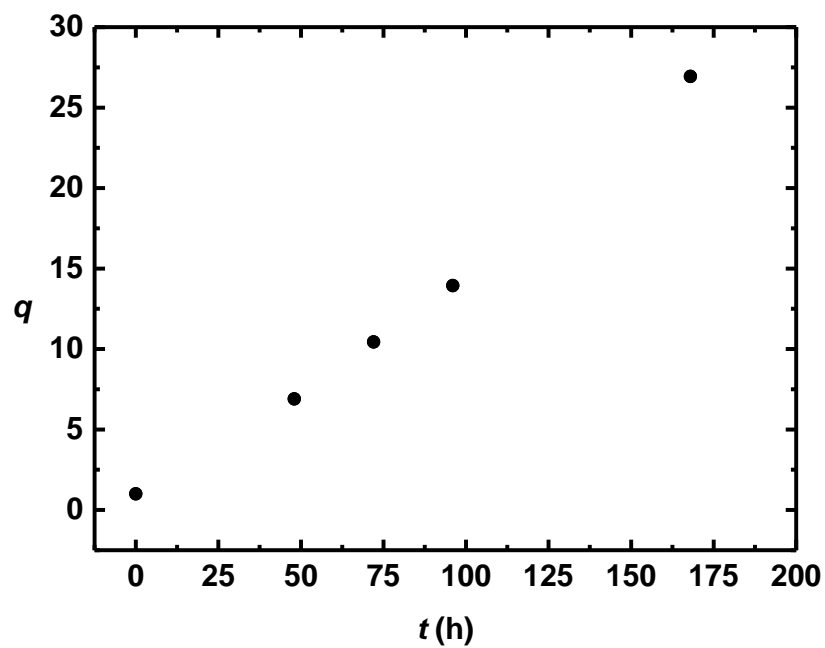

**Figure S5.** Swelling of a **W<sub>2</sub>-PDCPD** xerogel in bromobenzene with time.



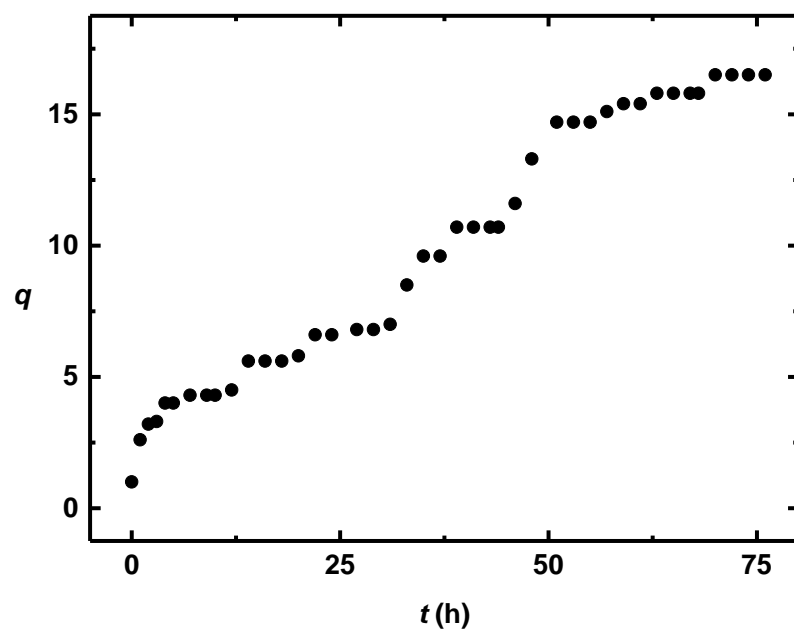

**Figure S6.** Swelling of a **W<sub>2</sub>-PDCPD** xerogel in carbon disulfide with time.

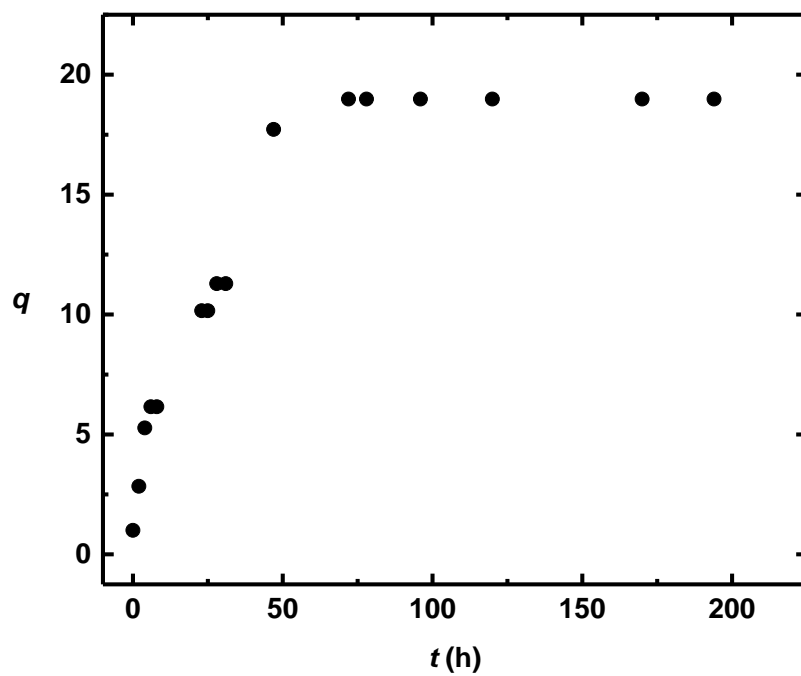

**Figure S7.** Swelling of a **W<sub>2</sub>-PDCPD** xerogel in 1,3-dichlorobenzene with time.

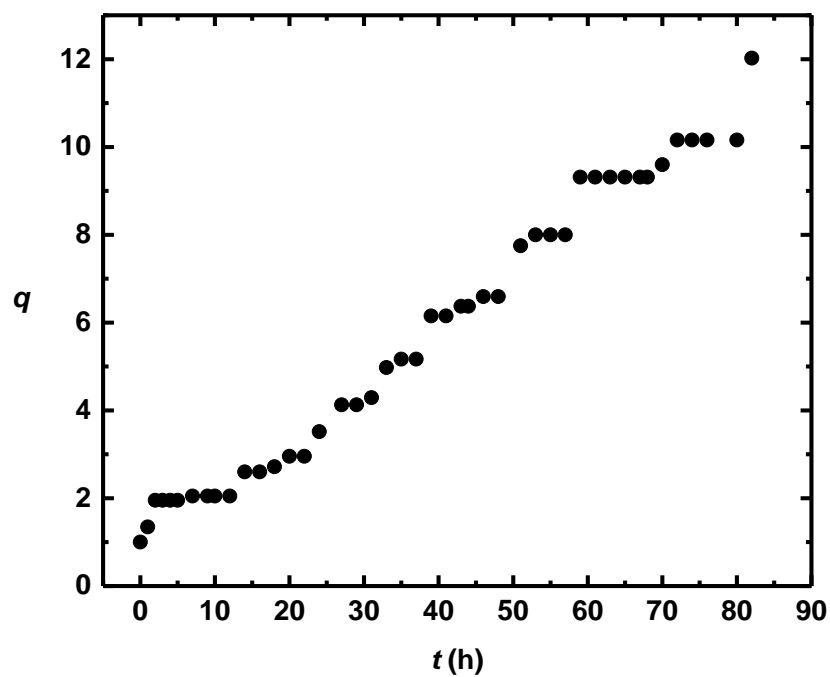

**Figure S8.** Swelling of a **W<sub>2</sub>-PDCPD** xerogel in carbon tetrachloride with time.

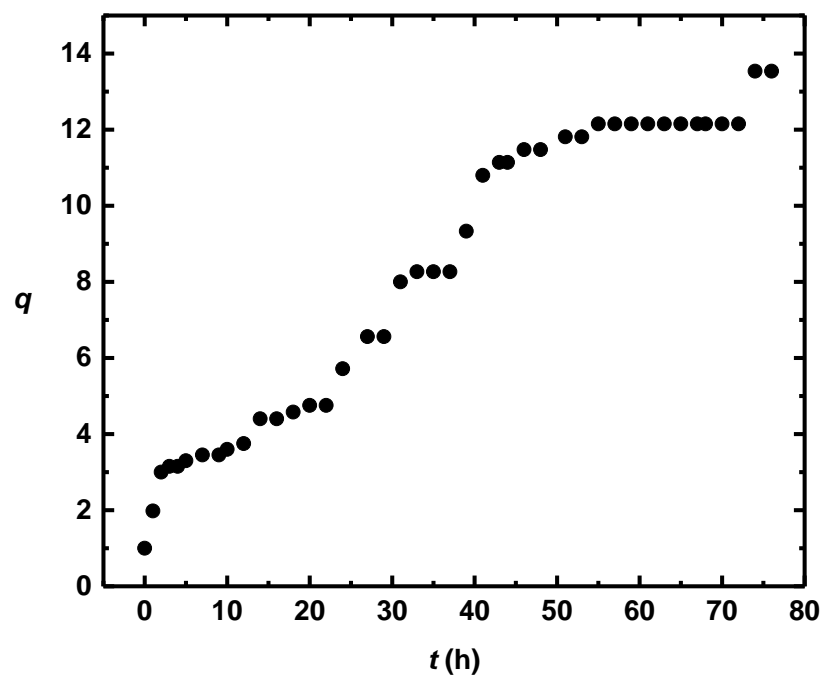

**Figure S9.** Swelling of a **W<sub>2</sub>-PDCPD** xerogel in chlorobenzene with time.

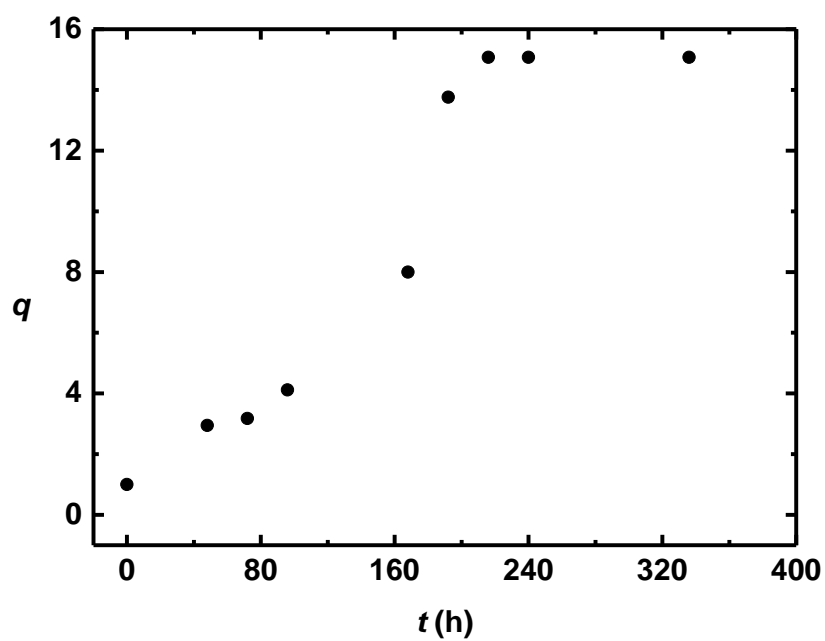

**Figure S10.** Swelling of a **W<sub>2</sub>-PDCPD** xerogel in 1,2-dibromoethane with time.

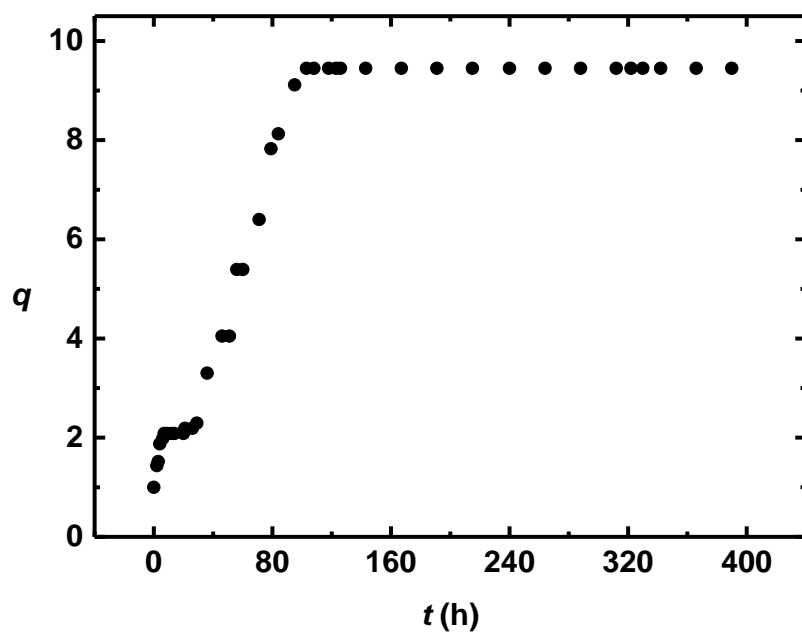

**Figure S11.** Swelling of a **W<sub>2</sub>-PDCPD** xerogel in tetrahydrofuran with time.

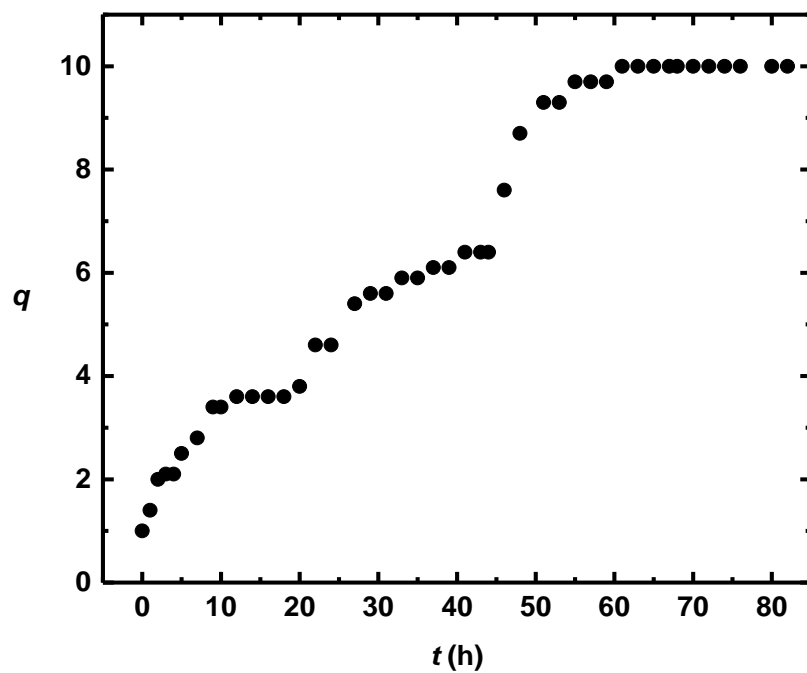

Figure S12. Swelling of a **W<sub>2</sub>-PDCPD** xerogel in benzene with time.

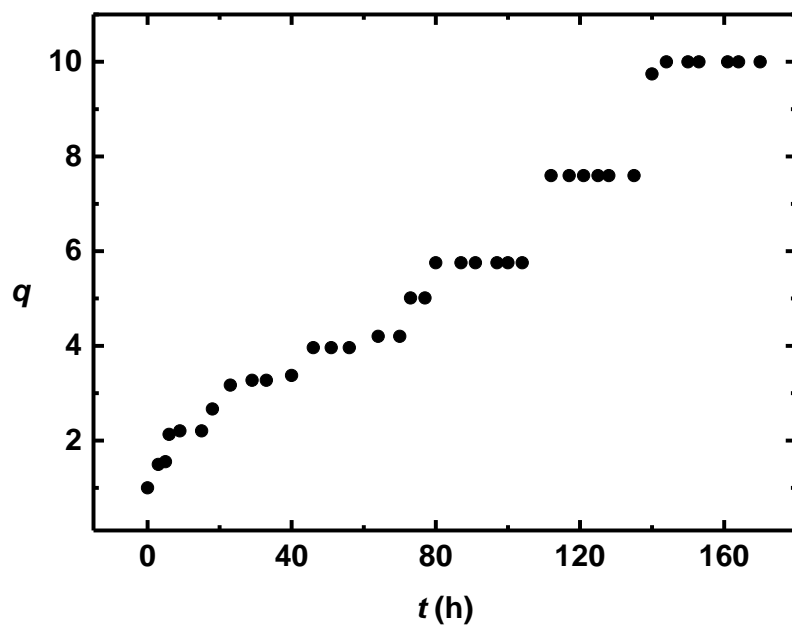

Figure S13. Swelling of a **W<sub>2</sub>-PDCPD** xerogel in ethyl bromide with time.

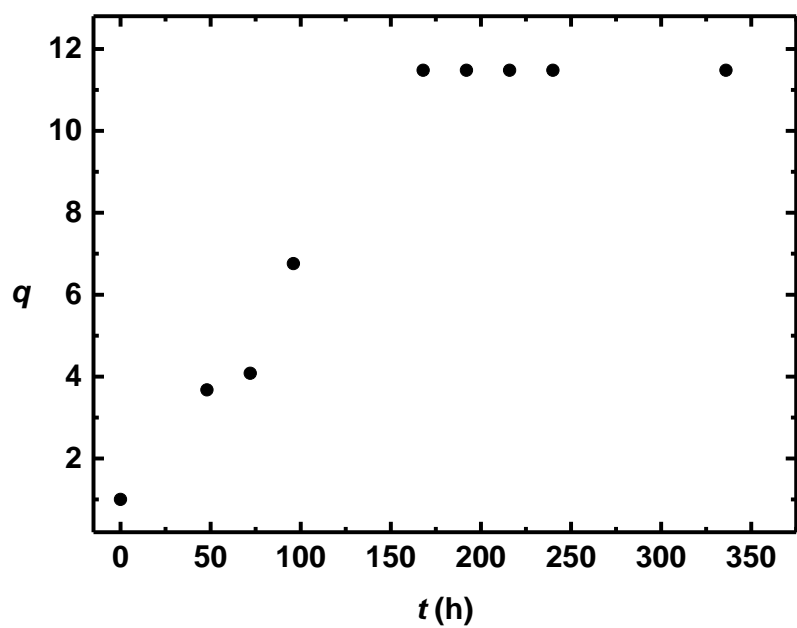

**Figure S14.** Swelling of a **W<sub>2</sub>-PDCPD** xerogel in 1-bromobutane with time.

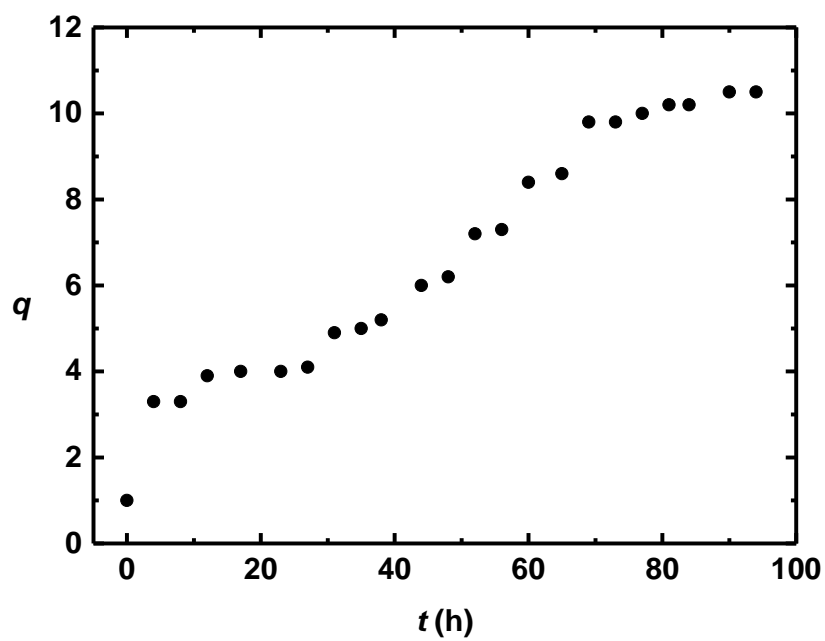

**Figure S15.** Swelling of a **W<sub>2</sub>-PDCPD** xerogel in methylene dichloride with time.

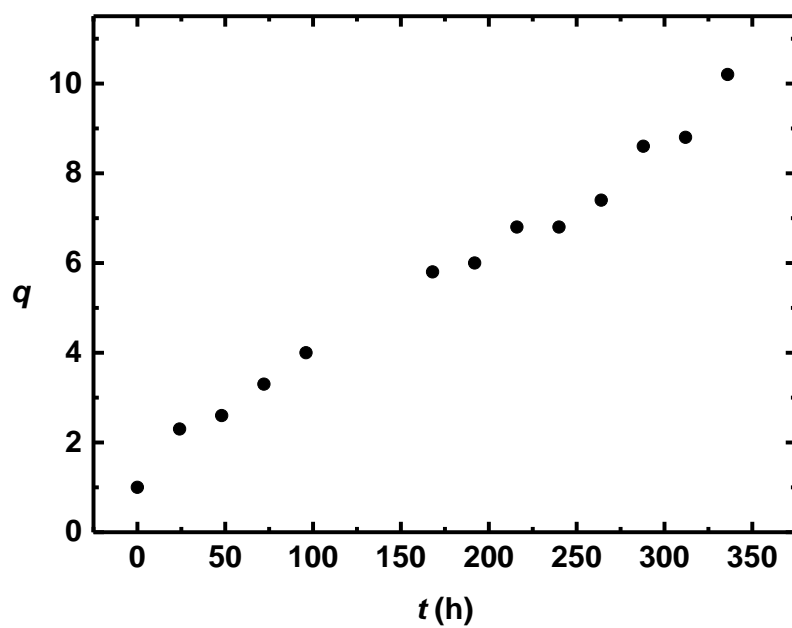

**Figure S16.** Swelling of a **W<sub>2</sub>-PDCPD** xerogel in 1,3,5-trimethylbenzene with time.

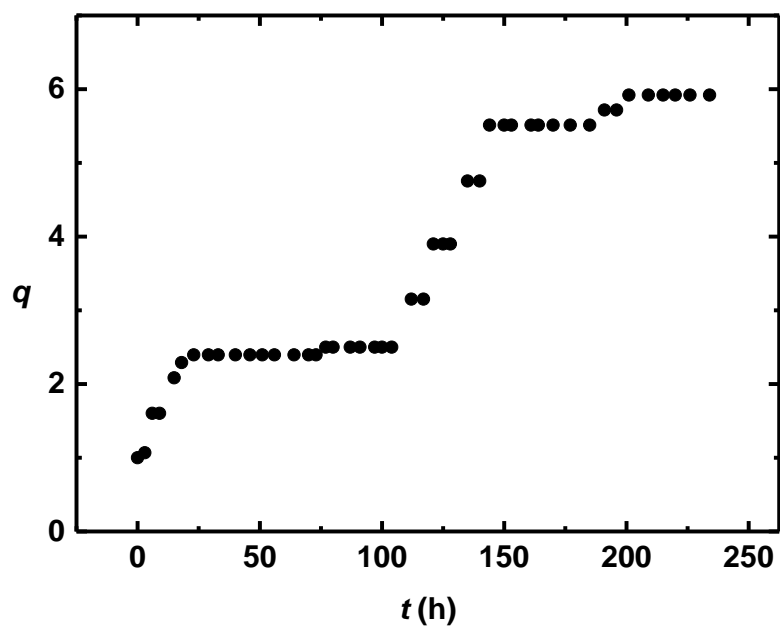

**Figure S17.** Swelling of a **W<sub>2</sub>-PDCPD** xerogel in 1,4-dimethylbenzene with time.

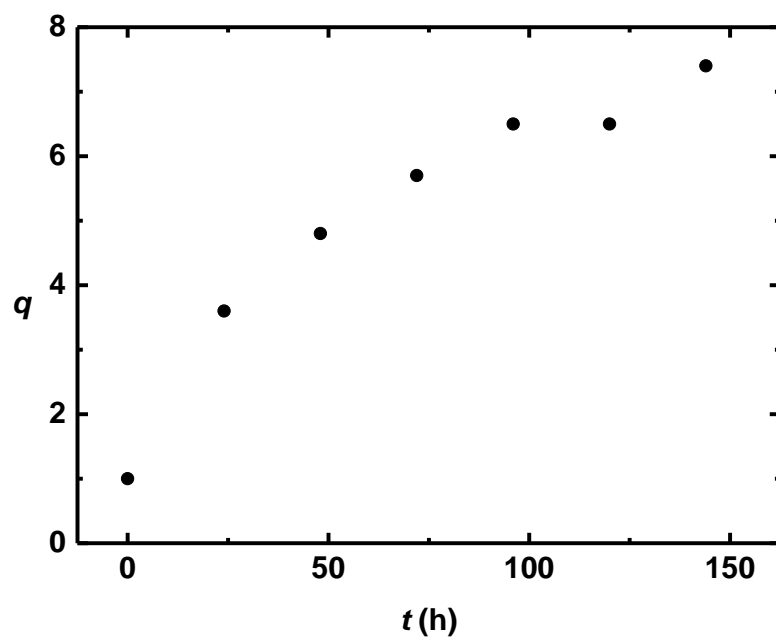

**Figure S18.** Swelling of a **W<sub>2</sub>-PDCPD** xerogel in 1,3-dimethylbenzene with time.

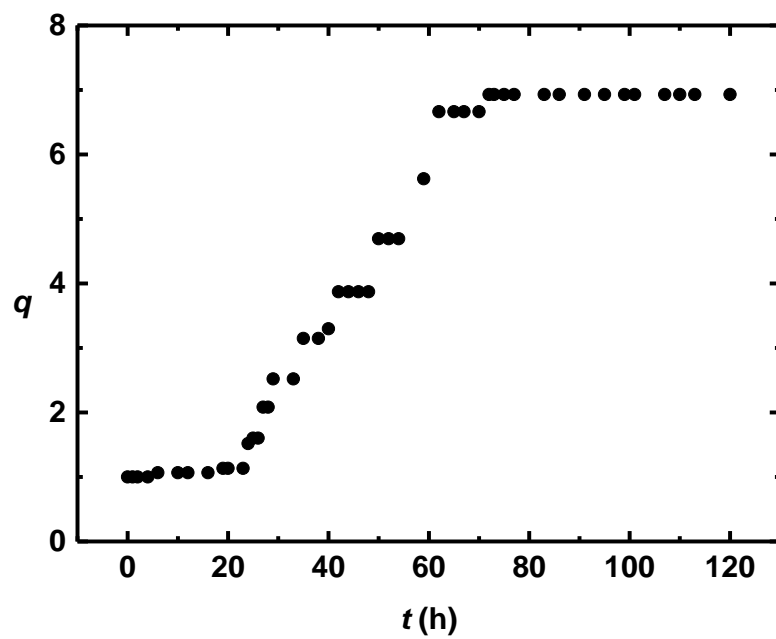

**Figure S19.** Swelling of a **W<sub>2</sub>-PDCPD** xerogel in 1,2-dichlorobenzene with time.

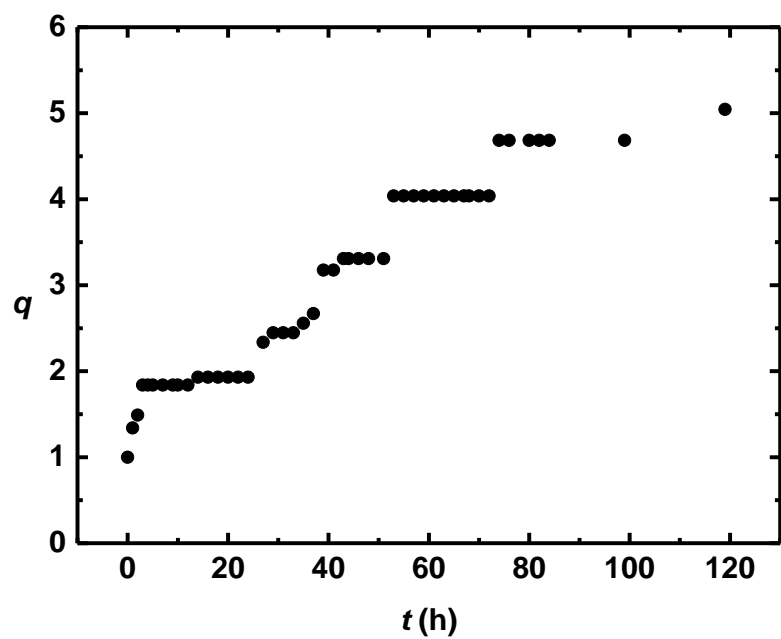

Figure S20. Swelling of a **W<sub>2</sub>-PDCPD** xerogel in benzyl chloride with time.

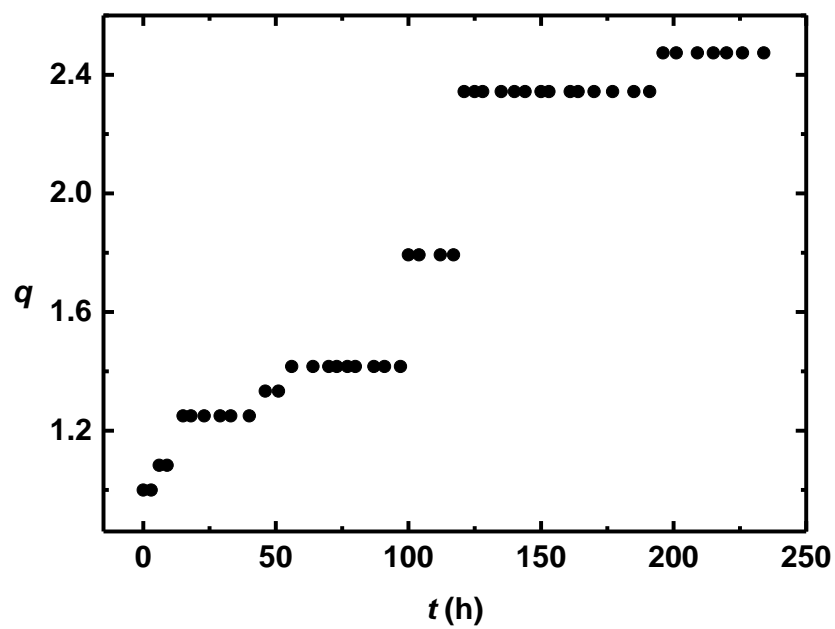

Figure S21. Swelling of a **W<sub>2</sub>-PDCPD** xerogel in cyclohexane with time.



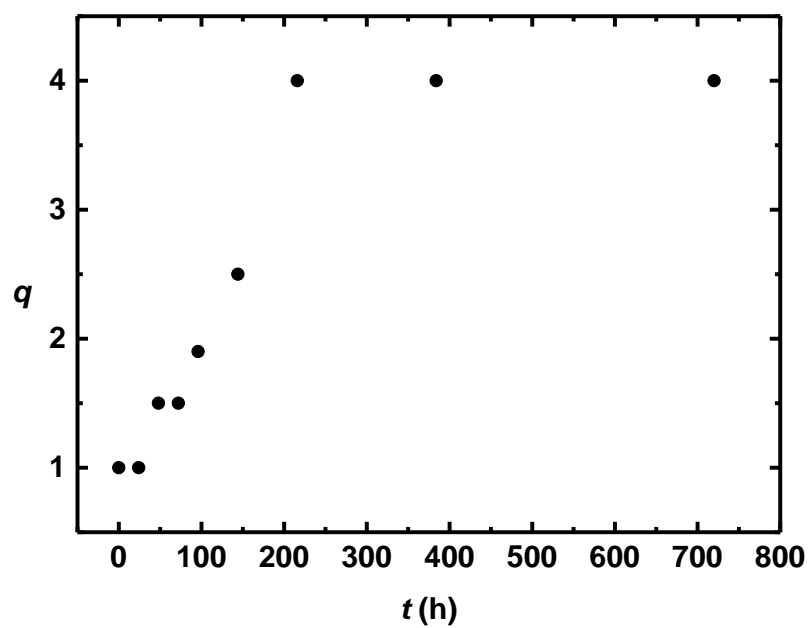

**Figure S22.** Swelling of a **W<sub>2</sub>-PDCPD** xerogel in 1,4-dioxane with time.

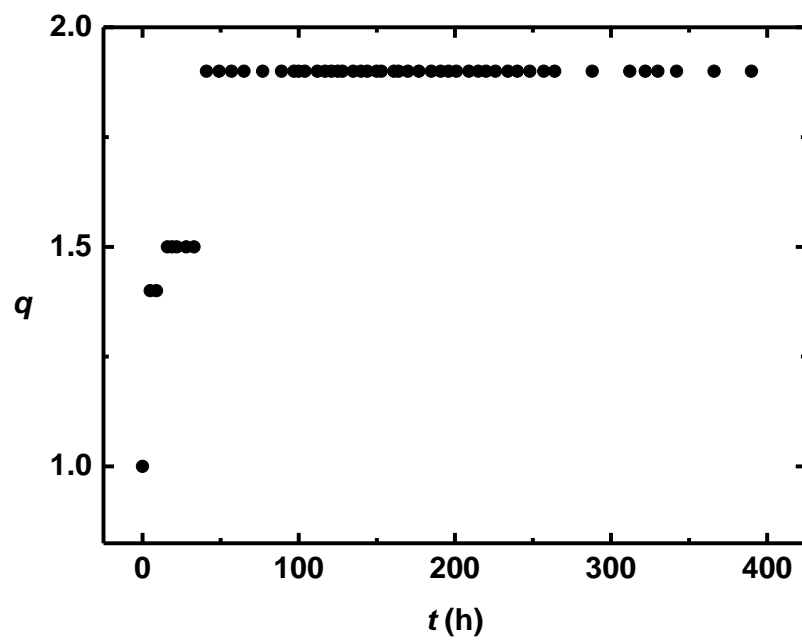

**Figure S23.** Swelling of a **W<sub>2</sub>-PDCPD** xerogel in cyclohexanone with time.

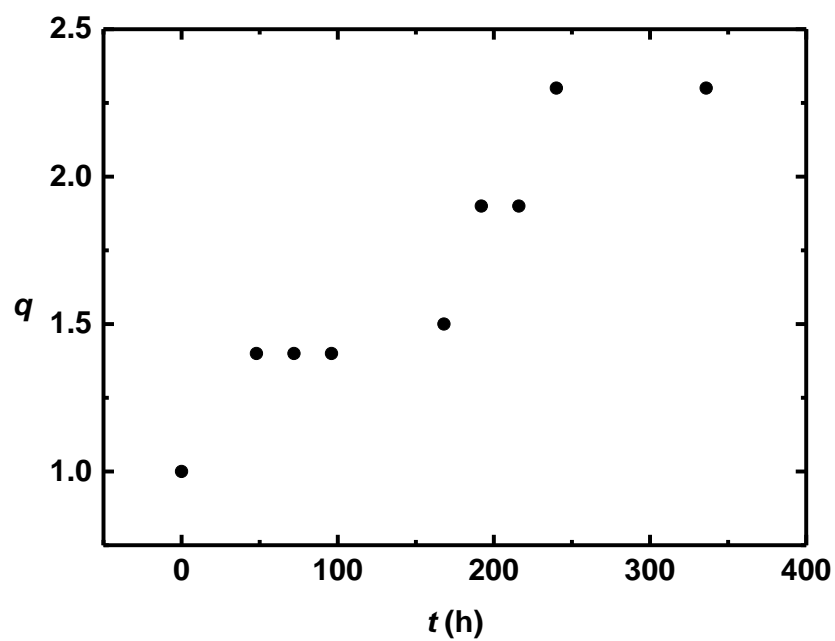

**Figure S24.** Swelling of a **W<sub>2</sub>-PDCPD** xerogel in 1,2-dichloroethane with time.

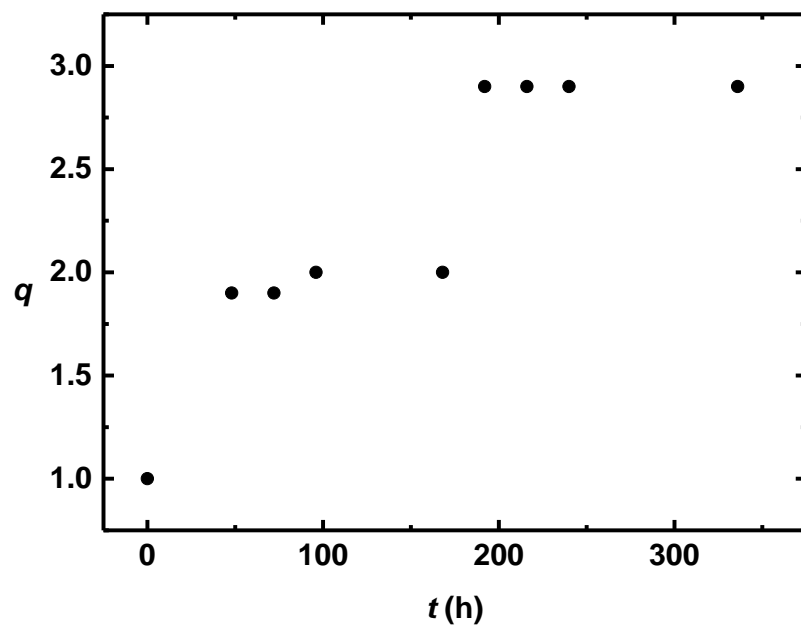

**Figure S25.** Swelling of a **W<sub>2</sub>-PDCPD** xerogel in pyridine with time.

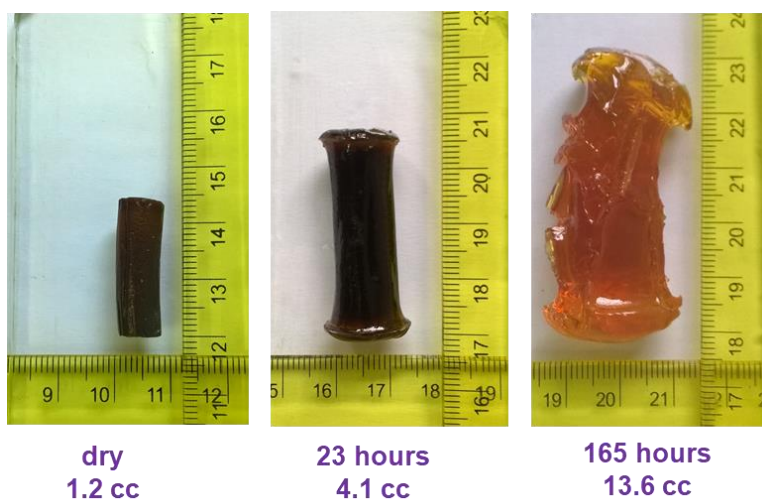

**Figure S26.** Swelling of a  $W_2$ -PDCPD xerogel in bromobenzene.

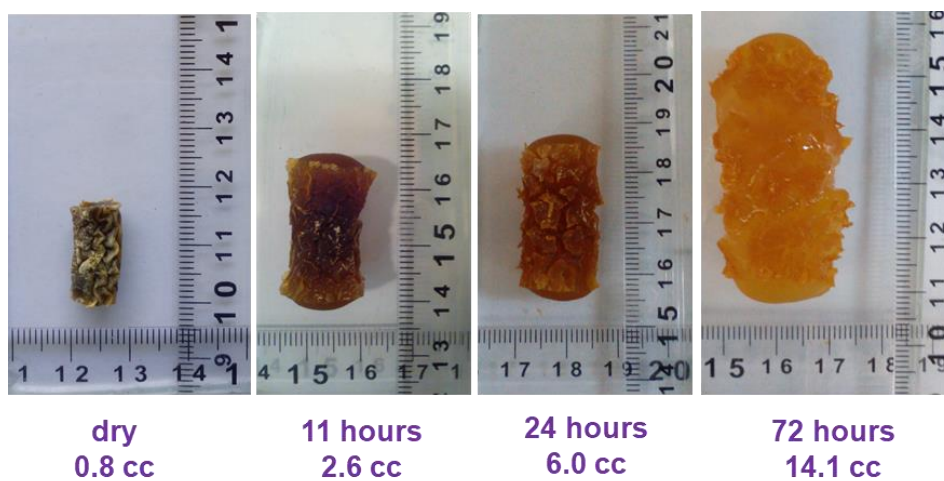

**Figure S27.** Swelling of a  $W_2$ -PDCPD xerogel in carbon disulfide.

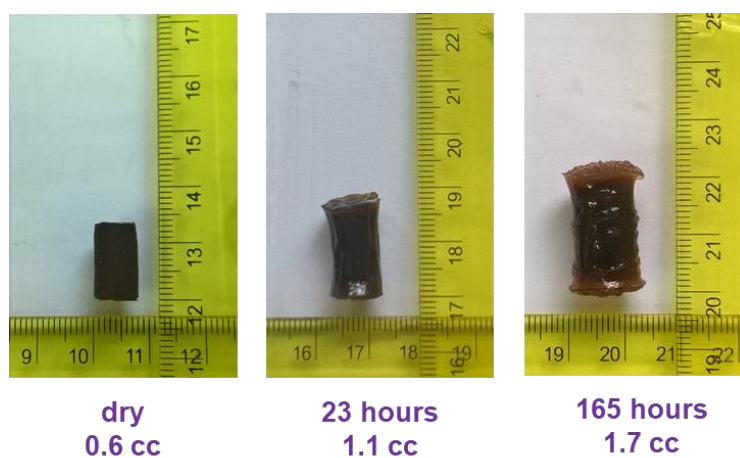

**Figure S28.** Swelling of a  $W_2$ -PDCPD xerogel in 1,2-dibromoethane.

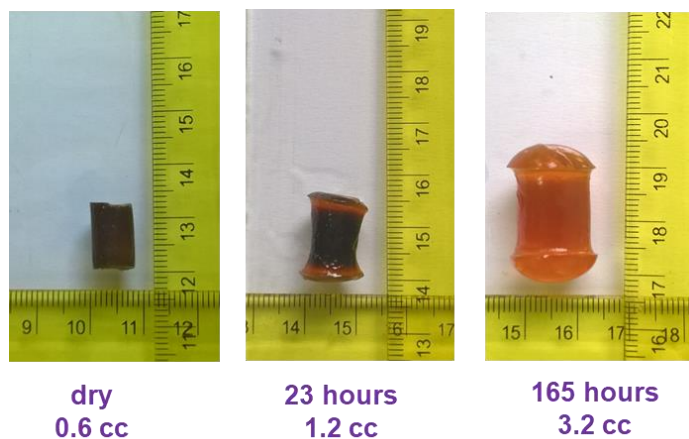

**Figure S29.** Swelling of a **W<sub>2</sub>-PDCPD** xerogel in 1,3,5-trimethylbenzene.

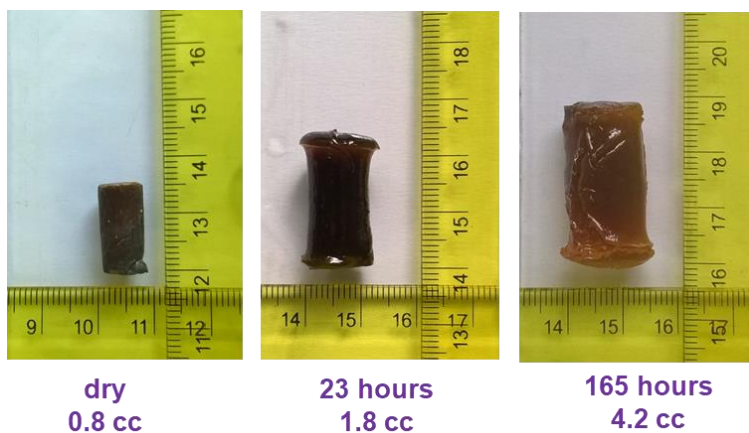

**Figure S30.** Swelling of a **W<sub>2</sub>-PDCPD** xerogel in 1,4-dimethylbenzene.

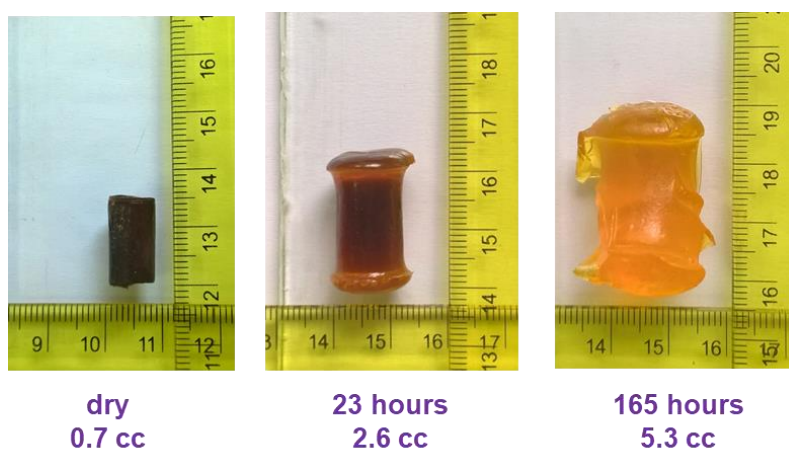

**Figure S31.** Swelling of a **W<sub>2</sub>-PDCPD** xerogel in 1,3-dimethylbenzene.

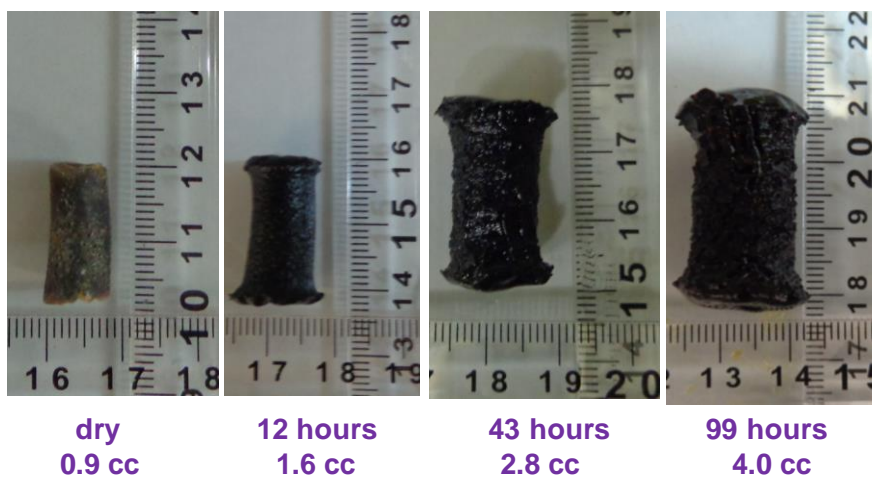

**Figure S32.** Swelling of a  $W_2$ -PDCPD xerogel in benzyl chloride.

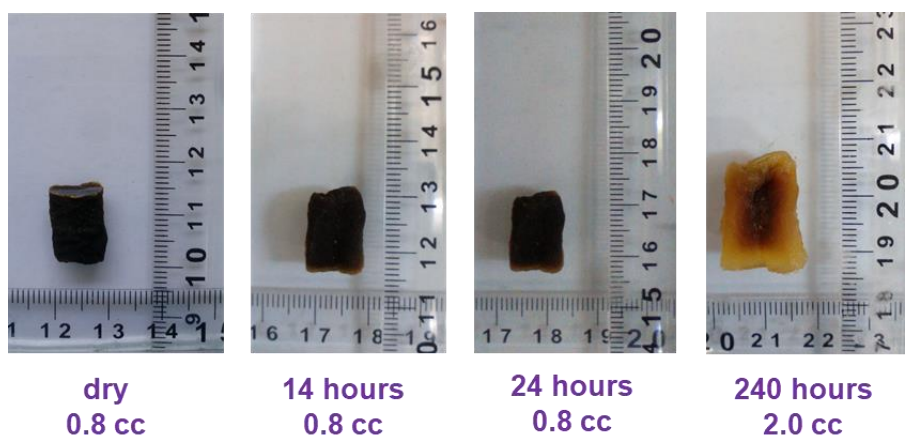

**Figure S33.** Swelling of a  $W_2$ -PDCPD xerogel in 1,4-dioxane.

## Comparison of solvent uptake of W<sub>2</sub>-PDCPD xerogels with polymeric materials from the literature

By comparison to other organic polymers on per weight basis, **W<sub>2</sub>-PDCPD** xerogels showed higher solvent uptake for toluene and CHCl<sub>3</sub> in several cases. Specifically, they outperformed: (a) photoresponsive copolymers derived from isodecyl acrylate, lauryl acrylate, *tert*-butylstyrene and 4-(methacrylamino)azobenzene ( $\sim 7\times$  higher for toluene and  $\sim 4\times$  higher for CHCl<sub>3</sub>);<sup>1</sup> (b) copolymers of cinnamoyloxy ethyl methacrylate and octadecyl acrylate ( $\sim 3\times$  higher for toluene);<sup>2</sup> (c) disulfide-linked polymeric networks based on trimethylolpropane tris(3-mercaptopropionate), or on pentaerythritol tetrakis(3-mercaptopropionate) (more than  $80\times$  higher for CHCl<sub>3</sub> and  $\sim 6\times$  higher for CH<sub>2</sub>Cl<sub>2</sub>);<sup>3</sup> (d) mesogenic polyelectrolyte gels ( $\sim 13\times$  higher for CHCl<sub>3</sub>);<sup>4</sup> (e) conjugated microporous (co)polymers synthesized from 1,3,5-triethynylbenzene or 1,3,5-triethynylbenzene and 1,4-diethynylbenzene ( $\sim 5\times$  higher for CHCl<sub>3</sub>);<sup>5</sup> (f) polymethylsilsesquioxanes (appr.  $6\times$  higher for CHCl<sub>3</sub>);<sup>6</sup> (g) porous polyurea monoliths derived from toluene diisocyanate ( $\sim 11\times$  higher for toluene,  $\sim 6\times$  higher for CHCl<sub>3</sub>);<sup>7</sup> (h) *cis*-9-octadecenyl-based polymers ( $\sim 30\times$  higher for toluene,  $\sim 10\times$  higher for CHCl<sub>3</sub>,  $\sim 2\times$  higher for THF,  $\sim 2.5\times$  higher for CH<sub>2</sub>Cl<sub>2</sub>,  $\sim 3\times$  higher for benzene);<sup>8</sup> and (i) poly(alkoxysilanes) (more than  $11\times$  higher for toluene,  $\sim 1.5\times$  higher for benzene, almost equal for THF and CH<sub>2</sub>Cl<sub>2</sub>).<sup>9</sup> On the other hand, solvent uptake was equal to or lower than what was reported for the photoresponsive polymer mentioned above (almost equal for CH<sub>2</sub>Cl<sub>2</sub>),<sup>1</sup> nanoporous polydivinylbenzene (almost equal for benzene),<sup>10</sup> mesogenic polyelectrolyte gels ( $\sim 4\times$  lower for THF and  $\sim 7\times$  lower for CH<sub>2</sub>Cl<sub>2</sub>),<sup>4</sup> and melamine formaldehyde sponges ( $\sim 2\times$  lower for CHCl<sub>3</sub>).<sup>11</sup> The last three materials as well as polymethylsilsesquioxanes could also absorb solvents that **W<sub>2</sub>-PDCPD** did not absorb (e.g., DMF, DMSO, ketones, alcohols, alkanes).<sup>4,6,11</sup> Compared to crosslinked lipophilic polyelectrolytes, **W<sub>2</sub>-PDCPD** showed higher uptake of toluene ( $\sim 7\times$ ), almost equal uptake of CHCl<sub>3</sub>, and lower uptakes of chlorobenzene ( $\sim 2\times$ ), THF ( $\sim 8\times$ ), CH<sub>2</sub>Cl<sub>2</sub> ( $\sim 8\times$ ), dichloroethane ( $\sim 65\times$ ), while those materials could also absorb several solvents that could not be absorbed by **W<sub>2</sub>-PDCPD** xerogels, mainly alcohols and ketones, signifying the superiority of the latter in terms of selectivity.<sup>12</sup>

**Table S1.** Solvent uptake and density of **W<sub>2</sub>-PDCPD** xerogels and other materials from the literature, for comparison purposes.

| Material                                                                   | Bulk density<br>(g cm <sup>-3</sup> ) | Toluene uptake       |                       |                                     | Chloroform uptake    |                       |                                     |
|----------------------------------------------------------------------------|---------------------------------------|----------------------|-----------------------|-------------------------------------|----------------------|-----------------------|-------------------------------------|
|                                                                            |                                       | (g g <sup>-1</sup> ) | (g cm <sup>-3</sup> ) | (cm <sup>3</sup> cm <sup>-3</sup> ) | (g g <sup>-1</sup> ) | (g cm <sup>-3</sup> ) | (cm <sup>3</sup> cm <sup>-3</sup> ) |
| Polymeric materials                                                        |                                       |                      |                       |                                     |                      |                       |                                     |
| W <sub>2</sub> -PDCPD                                                      | 0.9                                   | 111                  | 100                   | 115 <sup>13</sup>                   | 89                   | 80                    | 54 <sup>this work</sup>             |
| polyurethane foams <sup>14</sup>                                           | 0.061                                 | 28                   | 1.7                   | 2                                   |                      |                       |                                     |
| WCl <sub>6</sub> -PDCPD <sup>13</sup>                                      | 0.9                                   | 4.3                  | 3.9                   | 4.5                                 |                      |                       |                                     |
| GC-II-PDCPD aerogels <sup>15</sup>                                         | <1 <sup>b</sup>                       |                      |                       | 1.5                                 |                      |                       |                                     |
| GC-I-PDCPD <sup>16</sup>                                                   |                                       |                      |                       |                                     | 3.38                 |                       |                                     |
| GC-I-PDCPD aerogels                                                        | 0.282 <sup>15</sup>                   | 0                    | 0                     | 0 <sup>13</sup>                     |                      |                       |                                     |
| ROMP polymers from norbornene-terminated macromonomers <sup>17</sup>       |                                       | 36                   |                       |                                     |                      |                       |                                     |
| porous polyurea monoliths <sup>7</sup>                                     | 0.093                                 | 10.14                | 0.94                  | 1.1                                 | 15.02                | 1.40                  | 0.94                                |
| photoresponsive copolymer <sup>1</sup>                                     | <1 <sup>b</sup>                       | 15                   |                       |                                     | 19.5                 |                       |                                     |
| cinnamoyloxy ethyl methacrylate/octadecyl acrylate copolymers <sup>2</sup> | 0.54                                  | 34                   | 18                    | 21                                  |                      |                       |                                     |
| <i>cis</i> -9-octadecenyl-based polymers <sup>8</sup>                      |                                       | 3.69                 |                       |                                     | 8.5                  |                       |                                     |
| disulfide-linked polymeric networks <sup>3</sup>                           |                                       | 0.5                  |                       |                                     | 1.0                  |                       |                                     |
| conjugated microporous (co)polymers <sup>5</sup>                           | 0.027                                 |                      |                       |                                     | 16                   | 0.4                   | 0.3                                 |
| melamine formaldehyde sponges <sup>11</sup>                                | 0.010 <sup>a</sup>                    |                      |                       |                                     | 200                  | 2.0                   | 1.3                                 |
| mesogenic polyelectrolyte gels <sup>4</sup>                                |                                       |                      |                       |                                     | 6.5                  |                       |                                     |
| crosslinked lipophilic polyelectrolytes <sup>12</sup>                      |                                       | 15                   |                       |                                     | 75                   |                       |                                     |
| polymethylsilsesquioxanes <sup>6</sup>                                     | 0.12                                  |                      |                       |                                     | 15                   | 1.8                   | 1.2                                 |
| poly(alkoxysilanes) <sup>9</sup>                                           |                                       | 8.92                 |                       |                                     |                      |                       |                                     |
| Carbon materials                                                           |                                       |                      |                       |                                     |                      |                       |                                     |
| carbon nanotube sponges <sup>18</sup>                                      | 0.005-0.010                           |                      |                       |                                     | 175                  | 0.9-1.75              |                                     |
| graphene/carbon composite aerogels <sup>19</sup>                           | 0.003                                 | 279                  | 0.8                   | 1.0                                 | 400                  | 1.2                   | 0.8                                 |
| ultra-flyweight carbon aerogels <sup>20</sup>                              | 0.00016                               | 350                  | 0.06                  | 0.06                                | 550                  | 0.09                  | 0.06                                |
| nitrogen-doped graphene <sup>21</sup>                                      | 0.002                                 | 200                  | 0.4                   | 0.5                                 | 500                  | 1.0                   | 0.7                                 |
| spongy graphene <sup>22</sup>                                              | 0.012                                 | 55                   | 0.7                   | 0.8                                 | 85                   | 1.0                   | 0.7                                 |
| graphene/FeOOH aerogels <sup>23</sup>                                      |                                       | 15                   |                       |                                     |                      |                       |                                     |

<sup>a</sup> The density of melamine formaldehyde sponges has not been measured, but ref. 8 states that similar materials have densities below 0.010 g cm<sup>-3</sup>. <sup>b</sup> Polymers were floating on water.

**Table S2.** Experimental maximum volume degree of swelling ( $q_{\max}$ ) of **W2-PDCPD** xerogels in various solvents; Hansen Solubility Parameters (HSP),<sup>24</sup> molar volume ( $V_m$ )<sup>24</sup> and surface tension ( $\gamma$ ) of the solvents used in this study.

| Solvent                       | $q_{\max}^a$ | $\delta_D$<br>(MPa <sup>1/2</sup> ) | $\delta_P$<br>(MPa <sup>1/2</sup> ) | $\delta_H$<br>(MPa <sup>1/2</sup> ) | $\delta_T$<br>(MPa <sup>1/2</sup> ) | $V_m$<br>(cm <sup>3</sup> /mol) | $\gamma^b$<br>(mN/m) |
|-------------------------------|--------------|-------------------------------------|-------------------------------------|-------------------------------------|-------------------------------------|---------------------------------|----------------------|
| toluene                       | 115          | 18.0                                | 1.4                                 | 2.0                                 | 18.2                                | 106.6                           | 26.6                 |
| chloroform                    | 54           | 16.8                                | 5.7                                 | 8.0                                 | 19.5                                | 80.5                            | 25.3                 |
| bromobenzene                  | 24           | 17.8                                | 3.1                                 | 5.7                                 | 18.9                                | 105.6                           | 27.7                 |
| carbon disulfide              | 21           | 19.2                                | 5.5                                 | 4.1                                 | 20.4                                | 60.6                            | 26.7                 |
| 1,3-dichlorobenzene           | 19           | 20.2                                | 0.0                                 | 0.6                                 | 20.2                                | 114.5                           | 33.9                 |
| carbon tetrachloride          | 16           | 19.2                                | 5.1                                 | 2.7                                 | 20.0                                | 97.1                            | 30.6                 |
| chlorobenzene                 | 14           | 19.0                                | 4.3                                 | 2.0                                 | 19.6                                | 102.1                           | 30.0                 |
| 1,2-dibromoethane             | 13           | 19.2                                | 3.5                                 | 8.6                                 | 21.3                                | 86.6                            | 32.0                 |
| tetrahydrofuran               | 12           | 17.8                                | 0.0                                 | 0.6                                 | 17.8                                | 81.9                            | 23.5                 |
| benzene                       | 12           | 17.0                                | 7.3                                 | 7.1                                 | 19.8                                | 89.5                            | 27.1                 |
| ethyl bromide                 | 12           | 18.4                                | 0.0                                 | 2.0                                 | 18.5                                | 74.6                            | 24.5                 |
| 1-bromobutane                 | 11           | 16.5                                | 8.4                                 | 2.3                                 | 18.7                                | 100.0                           | 25.4                 |
| methylene dichloride          | 10           | 16.5                                | 3.6                                 | 3.0                                 | 17.2                                | 64.4                            | 19.6                 |
| 1,3,5-trimethylbenzene        | 8            | 18.0                                | 0.6                                 | 0.6                                 | 18.0                                | 139.5                           | 28.8                 |
| 1,4-dimethylbenzene           | 7            | 17.8                                | 1.0                                 | 3.1                                 | 18.1                                | 121.1                           | 27.4                 |
| 1,3-dimethylbenzene           | 7            | 18.0                                | 2.3                                 | 2.3                                 | 18.3                                | 100.0                           | 26.2                 |
| 1,2-dichlorobenzene           | 7            | 19.2                                | 6.3                                 | 3.3                                 | 20.5                                | 148.5                           | 36.3                 |
| benzyl chloride               | 5            | 16.8                                | 0.0                                 | 0.2                                 | 16.8                                | 115.4                           | 23.5                 |
| cyclohexane                   | 4            | 18.8                                | 7.1                                 | 2.6                                 | 20.3                                | 108.9                           | 31.8                 |
| 1,4-dioxane                   | 4            | 17.5                                | 1.8                                 | 9.0                                 | 19.8                                | 85.7                            | 27.1                 |
| cyclohexanone                 | 2            | 17.8                                | 8.4                                 | 5.1                                 | 20.3                                | 104.2                           | 30.4                 |
| 1,2-dichloroethane            | 2            | 17.0                                | 7.3                                 | 7.1                                 | 19.8                                | 148.5                           | 32.1                 |
| pyridine                      | 2            | 19.0                                | 8.8                                 | 5.9                                 | 21.8                                | 80.9                            | 31.9                 |
| water                         | 1            | 15.5                                | 16.0                                | 42.3                                | 47.8                                | 18.0                            | 68.7                 |
| pentane                       | 1            | 14.5                                | 0.0                                 | 0.0                                 | 14.5                                | 116.0                           | 17.5                 |
| <i>N,N</i> -dimethylformamide | 1            | 17.4                                | 13.7                                | 11.3                                | 24.9                                | 77.4                            | 36.6                 |
| methanol                      | 1            | 14.7                                | 12.3                                | 22.3                                | 29.4                                | 40.6                            | - <sup>c</sup>       |
| dimethylsulfoxide             | 1            | 18.4                                | 16.4                                | 10.2                                | 26.7                                | 71.3                            | 40.7                 |
| diethyl ether                 | 1            | 14.5                                | 2.9                                 | 4.6                                 | 15.5                                | 104.7                           | 18.4                 |
| acetonitrile                  | 1            | 15.3                                | 18.0                                | 6.1                                 | 24.4                                | 52.9                            | 29.7                 |
| acetone                       | 1            | 15.5                                | 10.4                                | 7.0                                 | 19.9                                | 73.8                            | 24.3                 |
| hexane                        | 1            | 14.9                                | 0.0                                 | 0.0                                 | 14.9                                | 131.4                           | 19.3                 |
| 2-propanol                    | 1            | 15.8                                | 6.1                                 | 16.4                                | 23.6                                | 76.9                            | - <sup>c</sup>       |
| glycerol                      | 1            | 17.4                                | 11.3                                | 27.2                                | 34.2                                | 73.4                            | - <sup>c</sup>       |
| ethylene glycol               | 1            | 17.0                                | 11.0                                | 26.0                                | 33.0                                | 55.9                            | - <sup>c</sup>       |
| benzyl alcohol                | 1            | 18.4                                | 6.3                                 | 13.7                                | 23.8                                | 103.8                           | 38.7                 |
| <i>N,N</i> -dimethylacetamide | 1            | 16.8                                | 11.5                                | 9.4                                 | 22.4                                | 93.0                            | 32.6                 |
| methyl-2-pyrrolidone          | 1            | 18.0                                | 12.3                                | 7.2                                 | 23.0                                | 96.6                            | 35.5                 |
| triethylamine                 | 1            | 15.5                                | 0.4                                 | 1.0                                 | 15.5                                | 139.7                           | 21.4                 |
| diisopropylamine              | 1            | 14.8                                | 3.7                                 | 1.5                                 | 15.3                                | 141.9                           | 20.4                 |
| aniline                       | 1            | 20.1                                | 5.8                                 | 11.2                                | 23.7                                | 91.6                            | 38.9                 |
| methyl methacrylate           | 1            | 15.8                                | 6.5                                 | 5.4                                 | 17.9                                | 106.7                           | 23.9                 |
| propylene carbonate           | 1            | 20.0                                | 18.0                                | 4.1                                 | 27.2                                | 85.2                            | 46.3                 |
| ethyl acetate                 | 1            | 15.8                                | 5.3                                 | 7.2                                 | 18.2                                | 98.6                            | 23.7                 |

<sup>a</sup> Experimental maximum volume degree of swelling of **W2-PDCPD** gels at  $t_{\max}$  (mean values of at least three measurements), calculated according to the equation  $q_{\max} = V_{\max}/V_{\text{in}}$ , where  $V_{\max}$  is the volume of the wet-gel at  $t_{\max}$  and  $V_{\text{in}}$  is the initial volume of the xerogel. <sup>b</sup> Surface tension ( $\gamma$ ) calculated from Beerbower's equation:  $\gamma = 0.01709 V_m^{1/3} [\delta_D^2 + 0.632(\delta_P^2 + \delta_H^2)]$ . <sup>c</sup> Beerbower's equation is not valid for aliphatic alcohols.



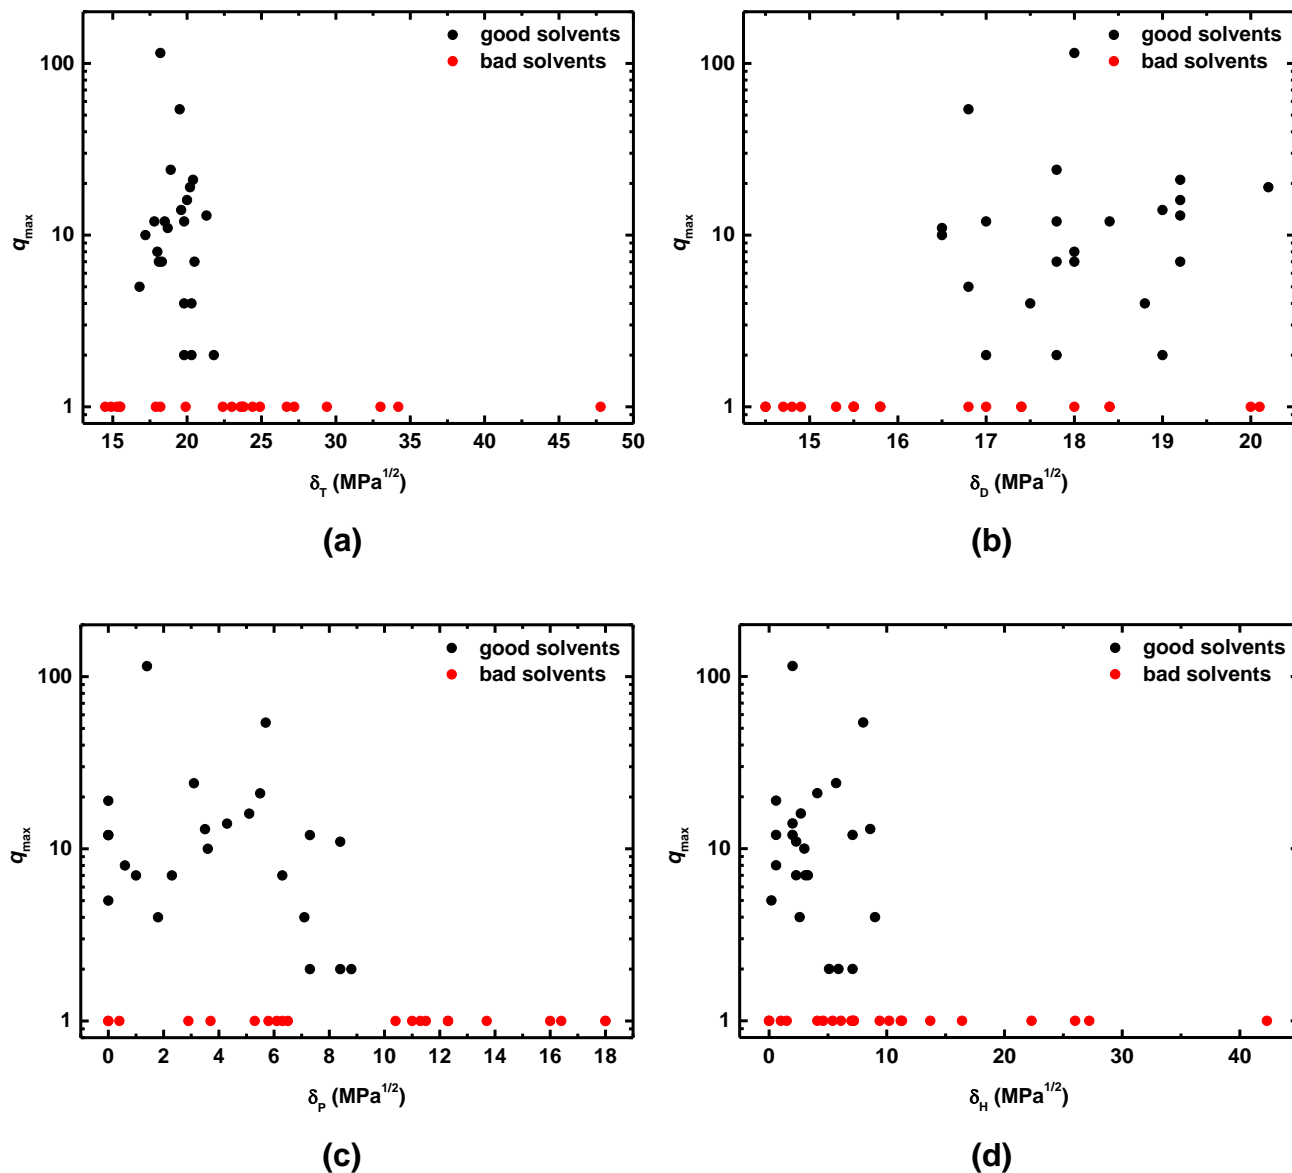

**Figure S34.** Relation between the experimental maximum volume degree of swelling ( $q_{\max}$ ) of **W<sub>2</sub>-PDCPD** xerogels and the Hansen Solubility Parameters (HSP): total solubility parameter ( $\delta_T$ , a), D-component ( $\delta_D$ , b), P-component ( $\delta_P$ , c) and H-component ( $\delta_H$ , d) of the respective solvents.

### *1<sup>st</sup> Method of HSPiP: Inside-Out Solvents*

Table S3 shows the HSP of all solvents used in this study, their empirical classification as score “1” solvents (gels swelled) or score “0” solvents (gels did not swell) and the corresponding RED (Relative Energy Difference) values. RED values were calculated using the formula:  $RED = (\text{distance of solvent from the center of the sphere}) / (\text{radius of the sphere})$ . RED values close to 0 indicate higher, and RED values close to 1 indicate lower affinity of the solvent with the molecule under study (located at the center of the sphere).

Figure S35 shows the generated sphere ( $R = 5.9$ ) and the HSP (in  $\text{MPa}^{1/2}$ ) for **W<sub>2</sub>-PDCPD**:  $\delta_D = 18.15$ ,  $\delta_P = 3.69$ ,  $\delta_H = 3.55 \text{ MPa}^{1/2}$ , and  $\delta_T = 18.86 \text{ MPa}^{1/2}$ . The 2D plots (Figure S36) display the boundaries in HSP space and help visualize whether the solvents tested cover sufficiently the entire range of each solubility parameter ( $\delta_P$ ,  $\delta_D$ , and  $\delta_H$ ). It is obvious that solvents covering the entire range of the three HSPs have been used.

**Table S3.** Experimental maximum volume degree of swelling ( $q_{\max}$ ) of **W<sub>2</sub>-PDCPD** xerogels in various solvents, Hansen Solubility Parameters (HSP) of the solvents,<sup>24</sup> scoring according to whether they are “good” (“1”) or “bad” (“0”) solvents, and calculated Relative Energy Differences (RED).

| Solvents                       | $q_{\max}$ <sup>a</sup> | $\delta_D$<br>(MPa <sup>1/2</sup> ) | $\delta_P$<br>(MPa <sup>1/2</sup> ) | $\delta_H$<br>(MPa <sup>1/2</sup> ) | score | RED <sup>b</sup> |
|--------------------------------|-------------------------|-------------------------------------|-------------------------------------|-------------------------------------|-------|------------------|
| 1,3-dimethylbenzene            | 115                     | 18.0                                | 2.3                                 | 2.3                                 | 1     | 0.327            |
| chloroform                     | 54                      | 17.8                                | 3.1                                 | 5.7                                 | 1     | 0.389            |
| chlorobenzene                  | 24                      | 19.0                                | 4.3                                 | 2.0                                 | 1     | 0.411            |
| 1,3-dichlorobenzene            | 21                      | 19.2                                | 5.1                                 | 2.7                                 | 1     | 0.470            |
| toluene                        | 19                      | 18.0                                | 1.4                                 | 2.0                                 | 1     | 0.485            |
| bromobenzene                   | 16                      | 19.2                                | 5.5                                 | 4.1                                 | 1     | 0.491            |
| 1,4-dimethylbenzene            | 14                      | 17.8                                | 1.0                                 | 3.1                                 | 1     | 0.502            |
| 1-bromobutane                  | 13                      | 16.5                                | 8.4                                 | 2.3                                 | 1     | 0.577            |
| 1,2-dichlorobenzene            | 12                      | 19.2                                | 6.3                                 | 3.3                                 | 1     | 0.590            |
| 1,2-dichloroethane             | 12                      | 17.0                                | 7.3                                 | 7.1                                 | 1     | 0.624            |
| benzyl chloride                | 12                      | 18.8                                | 7.1                                 | 2.6                                 | 1     | 0.665            |
| benzene                        | 11                      | 18.4                                | 0.0                                 | 2.0                                 | 1     | 0.683            |
| 1,3,5-trimethylbenzene         | 10                      | 18.0                                | 0.6                                 | 0.6                                 | 1     | 0.781            |
| carbon tetrachloride           | 8                       | 17.8                                | 0.0                                 | 0.6                                 | 1     | 0.820            |
| cyclohexanone                  | 7                       | 17.8                                | 8.4                                 | 5.1                                 | 1     | 0.869            |
| methylene dichloride           | 7                       | 1.7                                 | 7.3                                 | 7.1                                 | 1     | 0.891            |
| 1,2-dibromoethane              | 7                       | 19.2                                | 3.5                                 | 8.6                                 | 1     | 0.922            |
| tetrahydrofuran                | 5                       | 16.8                                | 5.7                                 | 8.0                                 | 1     | 0.931            |
| ethyl bromide                  | 4                       | 18.4                                | 0.0                                 | 2.0                                 | 1     | 0.966            |
| pyridine                       | 4                       | 19.0                                | 8.8                                 | 5.9                                 | 1     | 0.977            |
| carbon disulfide               | 2                       | 20.2                                | 0.0                                 | 0.6                                 | 1     | 0.992            |
| cyclohexane                    | 2                       | 16.8                                | 0.0                                 | 0.2                                 | 1     | 0.992            |
| 1,4-dioxane                    | 2                       | 17.5                                | 1.8                                 | 9.0                                 | 1     | 0.994            |
| methyl methacrylate            | 1                       | 15.8                                | 6.5                                 | 5.4                                 | 0     | 1.007            |
| ethyl acetate                  | 1                       | 15.8                                | 5.3                                 | 7.2                                 | 0     | 1.061            |
| trimethylamine                 | 1                       | 15.5                                | 0.4                                 | 1.0                                 | 0     | 1.229            |
| diisopropylamine               | 1                       | 14.8                                | 3.7                                 | 1.5                                 | 0     | 1.278            |
| diethyl ether                  | 1                       | 14.5                                | 2.9                                 | 4.6                                 | 0     | 1.289            |
| hexane                         | 1                       | 14.9                                | 0.0                                 | 0.0                                 | 0     | 1.493            |
| aniline                        | 1                       | 20.1                                | 5.8                                 | 11.2                                | 0     | 1.503            |
| acetone                        | 1                       | 15.5                                | 10.4                                | 7.0                                 | 0     | 1.511            |
| pentane                        | 1                       | 14.5                                | 0.0                                 | 0.0                                 | 0     | 1.576            |
| methyl-2-pyrrolidone           | 1                       | 18.0                                | 12.3                                | 7.2                                 | 0     | 1.603            |
| <i>N,N</i> -dimethyl acetamide | 1                       | 16.8                                | 11.5                                | 9.4                                 | 0     | 1.724            |
| benzyl alcohol                 | 1                       | 18.4                                | 6.3                                 | 13.7                                | 0     | 1.821            |
| dimethyl formamide             | 1                       | 17.4                                | 13.7                                | 11.3                                | 0     | 2.106            |
| 2-propanol                     | 1                       | 15.8                                | 6.1                                 | 16.4                                | 0     | 2.293            |
| dimethyl sulfoxide             | 1                       | 18.4                                | 16.4                                | 10.2                                | 0     | 2.339            |
| acetonitrile                   | 1                       | 15.3                                | 18.0                                | 6.1                                 | 0     | 2.421            |
| propylene carbonate            | 1                       | 20.0                                | 18.0                                | 4.1                                 | 0     | 2.482            |
| methanol                       | 1                       | 14.7                                | 12.3                                | 22.3                                | 0     | 3.228            |
| ethylene glycol                | 1                       | 17.0                                | 11.0                                | 26.0                                | 0     | 3.713            |
| glycerol                       | 1                       | 17.4                                | 11.3                                | 27.2                                | 0     | 4.076            |
| water                          | 1                       | 15.5                                | 16.0                                | 42.3                                | 0     | 5.314            |

<sup>a</sup> Experimental maximum volume degree of swelling of **W<sub>2</sub>-PDCPD** gels at  $t_{\max}$  (mean values of at least three measurements), calculated according to the equation  $q_{\max} = V_{\max}/V_{\text{in}}$ , where  $V_{\max}$  is the volume of the wet-gel at  $t_{\max}$  and  $V_{\text{in}}$  is the initial volume of the xerogel. <sup>b</sup> Values calculated by the HSPiP 5.1.02 software.

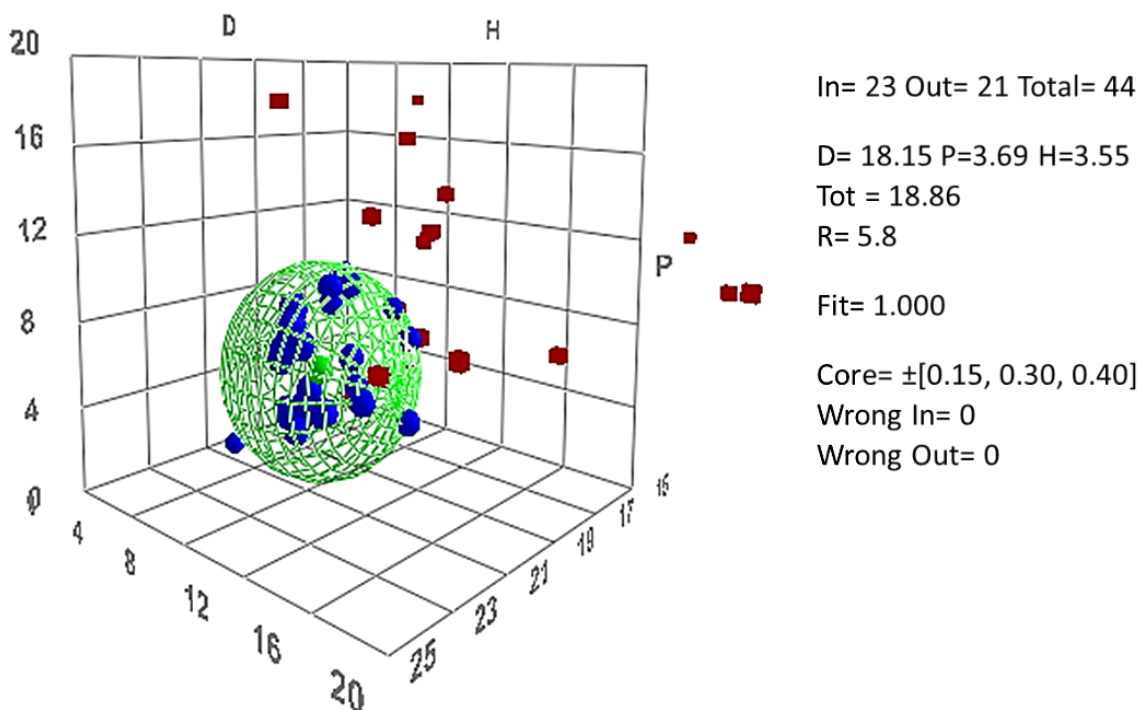

**Figure S35.** 3D plot of the individual Hansen Solubility Parameters (HSP) for each solvent tested. Blue dots represent solvents in which **W<sub>2</sub>-PDCPD** xerogels swelled (23 “good” solvents – score: “1”). Red squares represent solvents in which no swelling was observed (21 “bad” solvents – score: “0”). The green sphere, generated by the HSPiP 5.1.02 software, is the sphere with the minimum diameter that fits best the experimental data. The center of the sphere is a reasonable estimate of the HSP of **W<sub>2</sub>-PDCPD**, which is represented by the green dot. The sphere contains all “good” solvents and no “bad” solvents (referred to as wrong solvents), giving a fit value of 1.0, which is considered as a perfect fit.

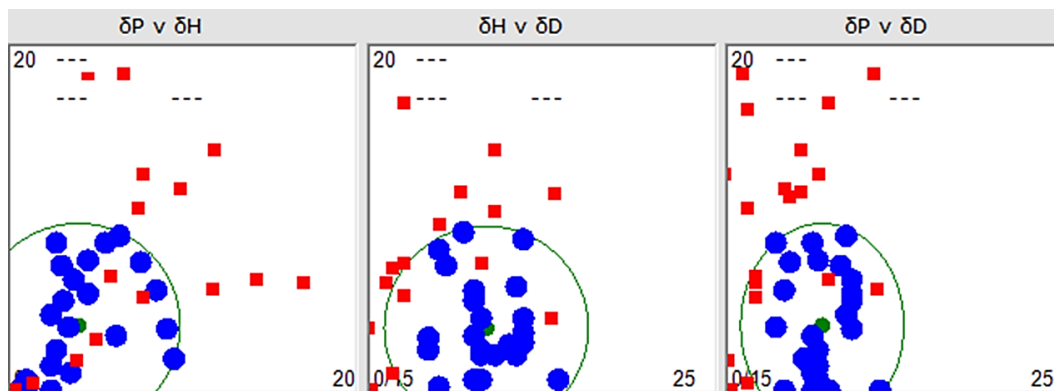

**Figure S36.** 2D projections, generated by the HSPiP 5.1.02 software, of the individual Hansen Solubility Parameters (HSP) for each solvent tested at the three planes of the cube inscribing the sphere of Figure S35, as indicated. Blue dots represent solvents in which **W<sub>2</sub>-PDCPD** xerogels swelled (“good” solvents). Red squares represent solvents in which no swelling was observed (“bad” solvents). The green dot represents **W<sub>2</sub>-PDCPD** itself. The green circle contains all “good” solvents.

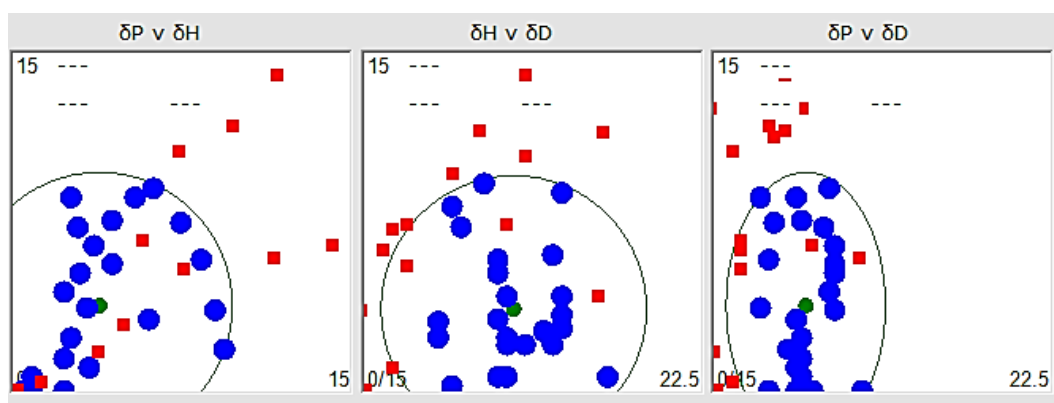

**Figure S37.** 2D projections, generated by the HSPiP 5.1.02 software, of the individual Hansen Solubility Parameters (HSP) for each solvent tested at the three planes of the cube inscribing the sphere of Figure 5 of the manuscript, as indicated. Blue dots represent solvents in which **W<sub>2</sub>-PDCPD** xerogels swelled (“good” solvents). Red squares represent solvents in which no swelling was observed (“bad” solvents). The green dot represents **W<sub>2</sub>-PDCPD** itself. The green circle contains all “good” solvents.

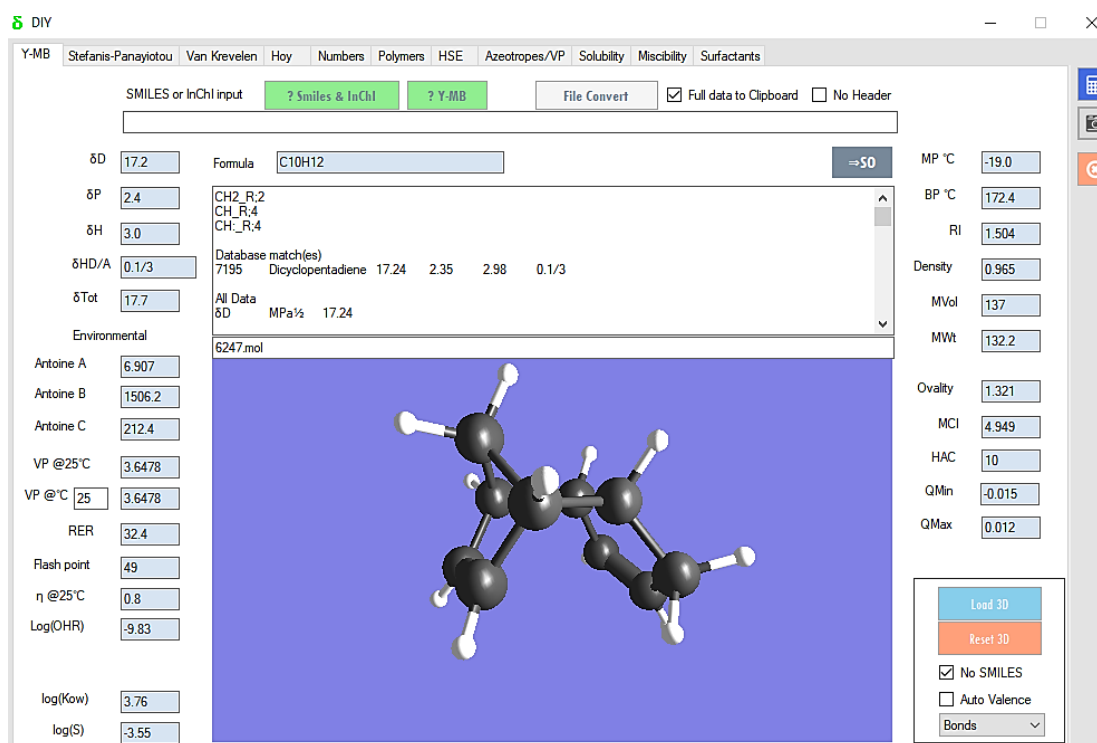

**Figure S38.** Calculation of the Hansen Solubility Parameters (HSP) of dicyclopentadiene (DCPD) using the DIY method of the HSPiP 5.1.02 software.

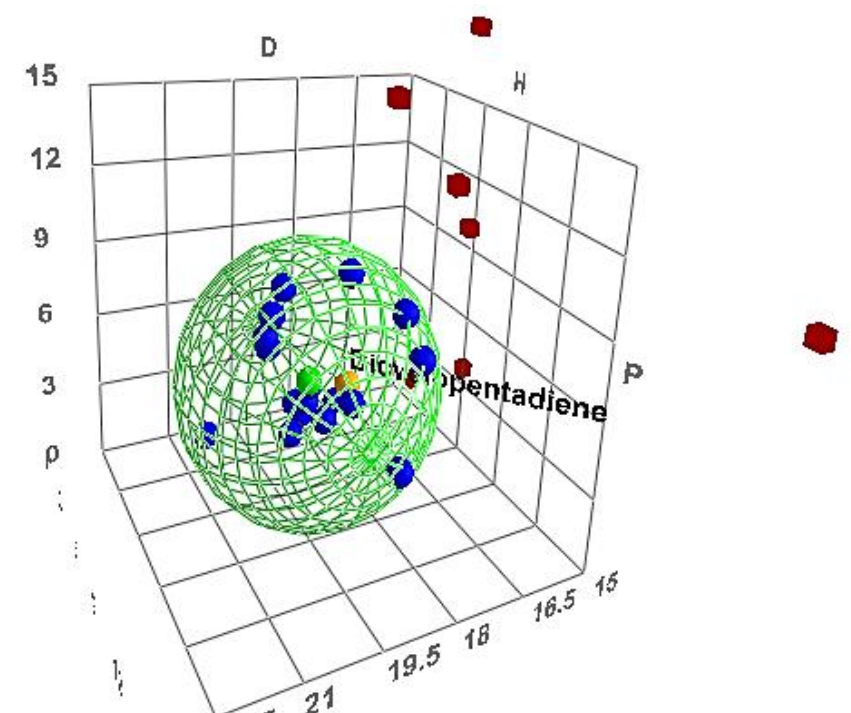

**Figure S39.** Same as Figure 5 of the manuscript, showing also the location of dicyclopentadiene (DCPD; orange dot; RED = 0.438).

**Table S4.** Calculated Hansen Solubility Parameters (HSP) of **W<sub>2</sub>-PDCPD** xerogels and solvents.

| Solvent                       | $\Delta 2\delta_D^a$<br>(MPa <sup>1/2</sup> ) | $\Delta\delta_P^b$<br>(MPa <sup>1/2</sup> ) | $\Delta\delta_H^c$<br>(MPa <sup>1/2</sup> ) |
|-------------------------------|-----------------------------------------------|---------------------------------------------|---------------------------------------------|
| toluene                       | 0.3                                           | 2.3                                         | 1.6                                         |
| chloroform                    | 0.7                                           | 0.6                                         | -2.2                                        |
| bromobenzene                  | -2.1                                          | -1.8                                        | -0.6                                        |
| carbon disulfide              | -4.1                                          | 3.7                                         | 3.7                                         |
| 1,3-dichlorobenzene           | -2.1                                          | -1.4                                        | 0.9                                         |
| carbon tetrachloride          | 0.7                                           | 3.7                                         | 3.0                                         |
| chlorobenzene                 | -1.7                                          | -0.6                                        | 1.6                                         |
| 1,2-dibromoethane             | -2.1                                          | 0.2                                         | -5.1                                        |
| tetrahydrofuran               | 2.7                                           | -2.0                                        | -4.5                                        |
| benzene                       | -0.5                                          | 3.7                                         | 1.6                                         |
| ethyl bromide                 | 3.3                                           | -4.7                                        | 1.3                                         |
| 1-bromobutane                 | 3.3                                           | 0.1                                         | 0.6                                         |
| methylene dichloride          | 2.3                                           | -3.6                                        | -3.6                                        |
| 1,3,5-trimethylbenzene        | 0.3                                           | 3.1                                         | 3.0                                         |
| 1,4-dimethylbenzene           | 0.7                                           | 2.7                                         | 0.5                                         |
| 1,3-dimethylbenzene           | 0.3                                           | 1.4                                         | 1.3                                         |
| 1,2-dichlorobenzene           | -2.1                                          | -2.6                                        | 0.3                                         |
| benzyl chloride               | -1.3                                          | -3.4                                        | 1.0                                         |
| cyclohexane                   | 2.7                                           | 3.7                                         | 3.4                                         |
| 1,4-dioxane                   | 1.3                                           | 1.9                                         | -5.5                                        |
| cyclohexanone                 | 0.7                                           | -4.7                                        | -1.6                                        |
| 1,2-dichloroethane            | 2.3                                           | -3.6                                        | -3.6                                        |
| pyridine                      | -1.7                                          | -5.1                                        | -2.4                                        |
| water                         | 5.3                                           | -12.3                                       | -38.8                                       |
| pentane                       | 7.3                                           | 3.7                                         | 3.6                                         |
| <i>N,N</i> -dimethylformamide | 1.5                                           | -10.0                                       | -7.8                                        |
| methanol                      | 6.9                                           | -8.6                                        | -18.8                                       |
| dimethylsulfoxide             | -0.5                                          | -12.7                                       | -6.7                                        |
| diethyl ether                 | 7.3                                           | 0.8                                         | -1.1                                        |
| acetonitrile                  | 5.7                                           | -14.3                                       | -2.6                                        |
| acetone                       | 5.3                                           | -6.7                                        | -3.5                                        |
| hexane                        | 6.5                                           | 3.7                                         | 3.6                                         |
| 2-propanol                    | 4.7                                           | -2.4                                        | -12.9                                       |
| glycerol                      | 1.5                                           | -7.6                                        | -23.7                                       |
| ethylene glycol               | 2.3                                           | -7.3                                        | -22.5                                       |
| benzyl alcohol                | -0.5                                          | -2.6                                        | -10.2                                       |
| <i>N,N</i> -dimethylacetamide | 2.7                                           | -7.8                                        | -5.9                                        |
| methyl-2-pyrrolidone          | 0.3                                           | -8.6                                        | -3.7                                        |
| triethylamine                 | 5.3                                           | 3.3                                         | 2.6                                         |
| diisopropylamine              | 6.7                                           | 0.0                                         | 2.1                                         |
| aniline                       | -3.9                                          | -2.1                                        | -7.7                                        |
| methyl methacrylate           | 4.7                                           | -2.8                                        | -1.9                                        |
| propylene carbonate           | -3.7                                          | -14.3                                       | -0.6                                        |
| ethyl acetate                 | 4.7                                           | -1.6                                        | -3.7                                        |

<sup>a</sup>  $\Delta 2\delta_D = (2\delta_{D1}) - (2\delta_{D2})$ . <sup>b</sup>  $(\Delta\delta_P) = (\delta_{P1}) - (\delta_{P2})$ . <sup>c</sup>  $(\Delta\delta_H) = (\delta_{H1}) - (\delta_{H2})$ . “1” refers to **W<sub>2</sub>-PDCPD** xerogels and “2” refers to the solvent. Hansen Solubility Parameters (HSP) for **W<sub>2</sub>-PDCPD**:  $\delta_D = 18.15$ ,  $\delta_P = 3.69$ ,  $\delta_H = 3.55$  MPa<sup>1/2</sup>.

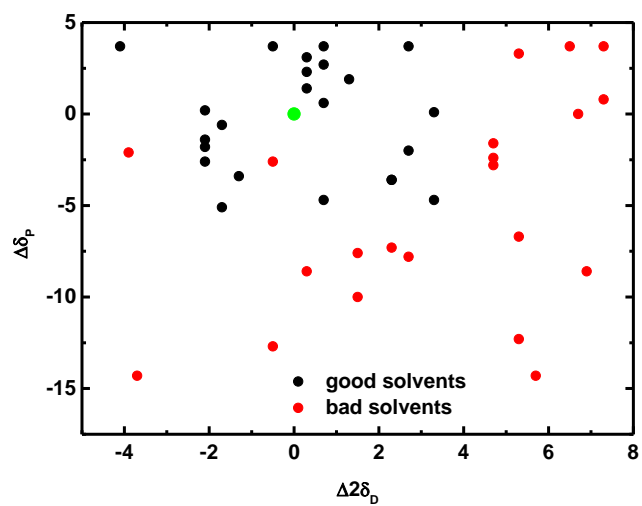

(a)

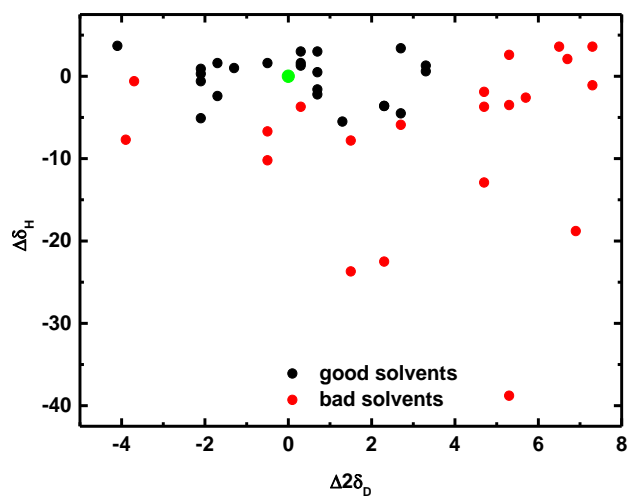

(b)

**Figure S40.** 2D plots of the magnitude differences between the solvent and **W<sub>2</sub>-PDCPD** xerogels:  $\Delta\delta_P$  vs  $\Delta 2\delta_D$  (a) and  $\Delta\delta_H$  vs  $\Delta 2\delta_D$  (b). Green dot shows point (0,0).



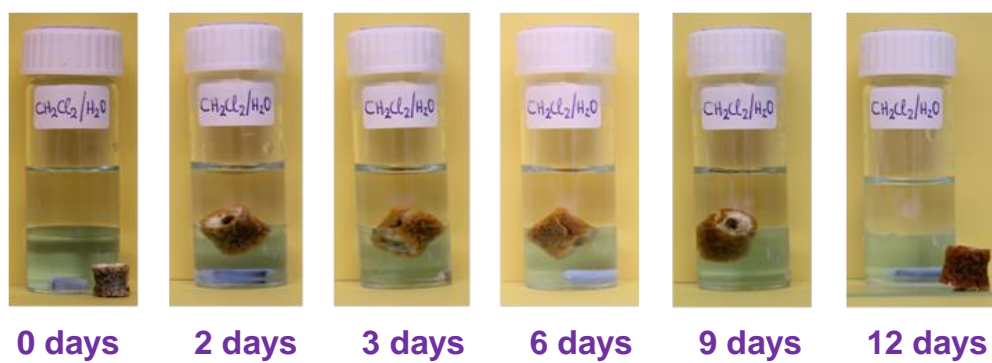

**Figure S41.** Separation of methylene dichloride (dye) from water using **W<sub>2</sub>-PDCPD** xerogels.

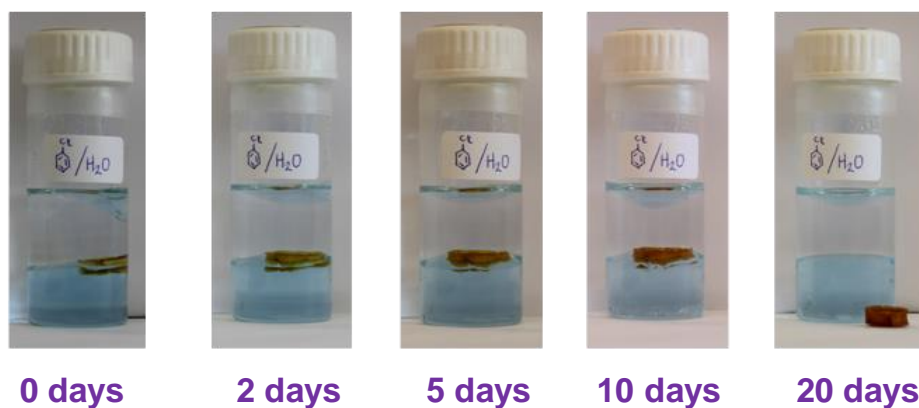

**Figure S42.** Separation of chlorobenzene (dye) from water using **W<sub>2</sub>-PDCPD** xerogels.

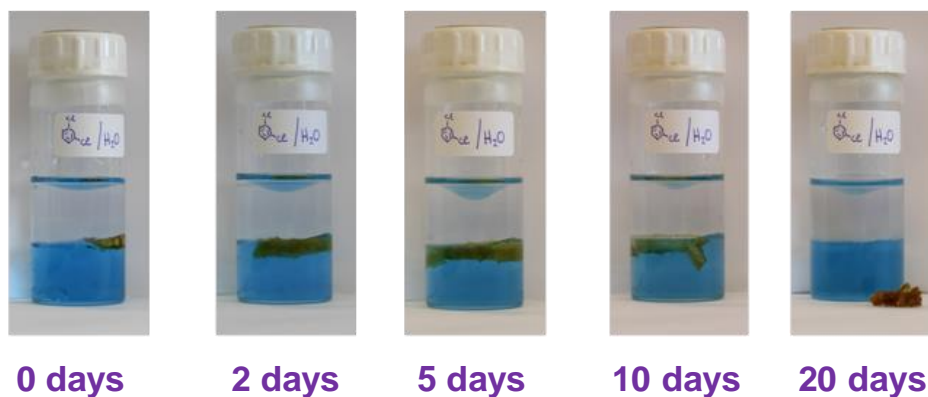

**Figure S43.** Separation of 1,3-dichlorobenzene (dye) from water using **W<sub>2</sub>-PDCPD** xerogels.

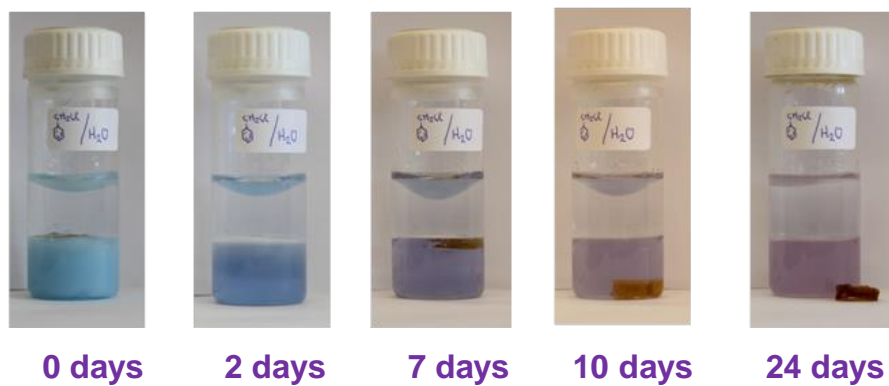

**Figure S44.** Separation of benzyl chloride (dye) from water using **W<sub>2</sub>-PDCPD** xerogels.

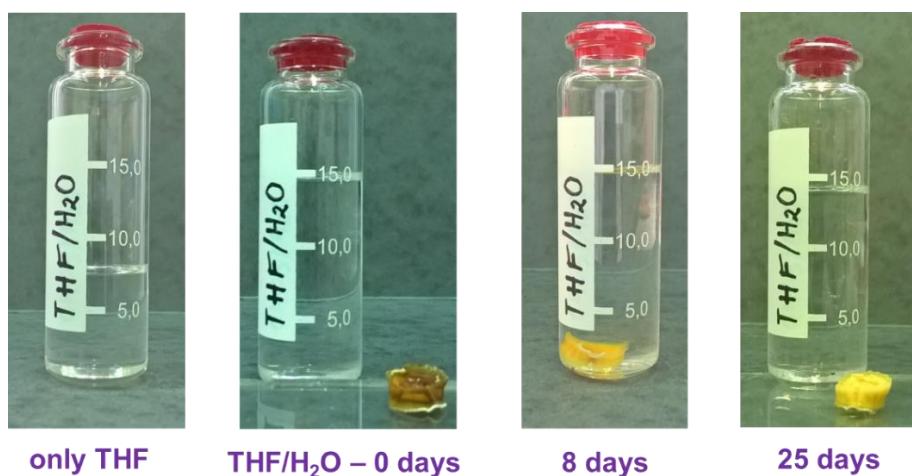

**Figure S45.** Separation of tetrahydrofuran from water using **W<sub>2</sub>-PDCPD** xerogels.

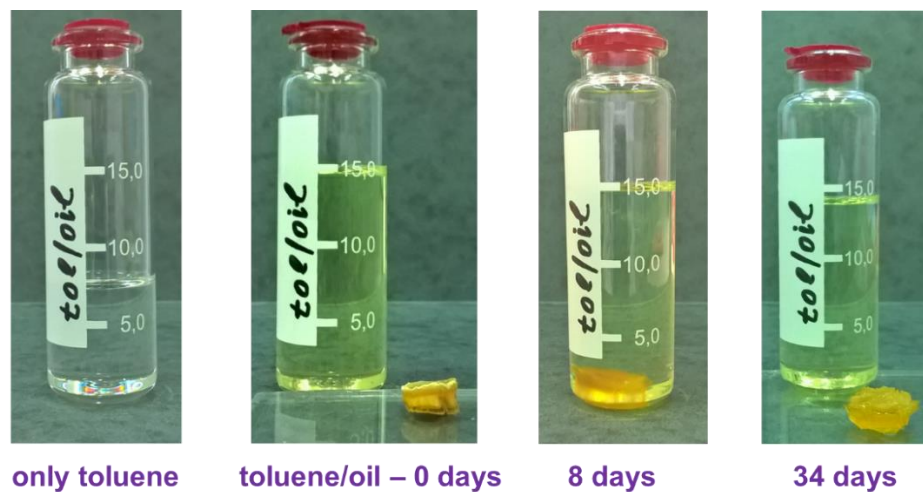

**Figure S46.** Separation of toluene from oil using **W<sub>2</sub>-PDCPD** xerogels.

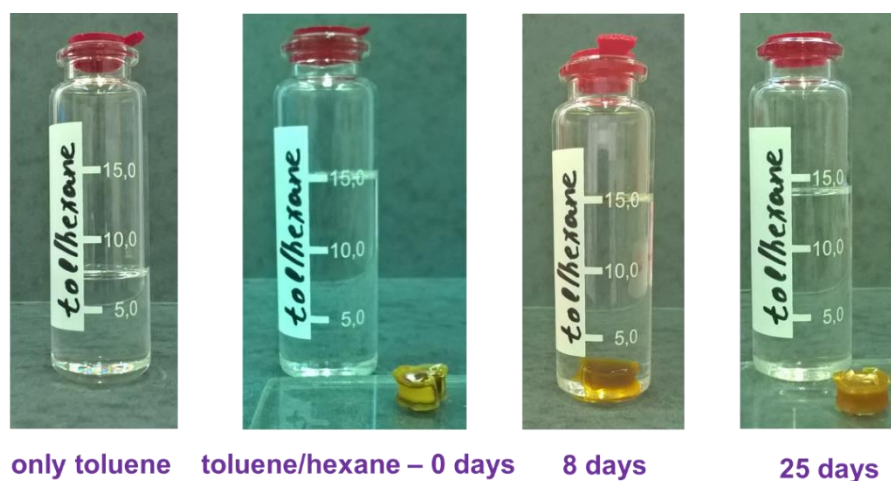

**Figure S47.** Separation of toluene from hexane using **W<sub>2</sub>-PDCPD** xerogels.

## References

- (1) Kulawardana, E. U.; Neckers, D. C. Photoresponsive Oil Sorbers. *J. Polym. Sci. Part Polym. Chem.* **2010**, 48 (1), 55–62. <https://doi.org/10.1002/pola.23753>.
- (2) Atta, A. M.; El-Ghazawy, R. A. M.; Farag, R. K.; Abdel-Azim, A.-A. A. Crosslinked Reactive Macromonomers Based on Polyisobutylene and Octadecyl Acrylate Copolymers as Crude Oil Sorbers. *React. Funct. Polym.* **2006**, 66 (9), 931–943. <https://doi.org/10.1016/j.reactfunctpolym.2006.01.001>.
- (3) Patel, H. A.; Yavuz, M. S.; Yavuz, C. T. Exceptional Organic Solvent Uptake by Disulfide-Linked Polymeric Networks. *RSC Adv.* **2014**, 4 (46), 24320–24323. <https://doi.org/10.1039/C4RA03355H>.
- (4) Nishikori, Y.; Iseda, K.; Kokado, K.; Sada, K.; Nishikori, Y.; Iseda, K.; Kokado, K.; Sada, K. Mesogenic Polyelectrolyte Gels Absorb Organic Solvents and Liquid Crystalline Molecules. *Polymers* **2016**, 8 (4), 148. <https://doi.org/10.3390/polym8040148>.
- (5) Li, A.; Sun, H.-X.; Tan, D.-Z.; Fan, W.-J.; Wen, S.-H.; Qing, X.-J.; Li, G.-X.; Li, S.-Y.; Deng, W.-Q. Superhydrophobic Conjugated Microporous Polymers for Separation and Adsorption. *Energy Environ. Sci.* **2011**, 4 (6), 2062–2065. <https://doi.org/10.1039/C1EE01092A>.
- (6) Hayase, G.; Kanamori, K.; Fukuchi, M.; Kaji, H.; Nakanishi, K. Facile Synthesis of Marshmallow-like Macroporous Gels Usable under Harsh Conditions for the Separation of Oil and Water. *Angew. Chem. Int. Ed.* **2013**, 52 (7), 1986–1989. <https://doi.org/10.1002/anie.201207969>.
- (7) Lin, P.; Meng, L.; Huang, Y.; Liu, L. Synthesis of Porous Polyurea Monoliths Assisted by Centrifugation as Adsorbents for Water Purification. *Colloids Surf. Physicochem. Eng. Asp.* **2016**, 506, 87–95. <https://doi.org/10.1016/j.colsurfa.2016.06.017>.

- (8) Dutta, P.; Gogoi, B.; Dass, N. N.; Sen Sarma, N. Efficient Organic Solvent and Oil Sorbent Co-Polyesters: Poly-9-Octadecenylacrylate/Methacrylate with 1-Hexene. *React. Funct. Polym.* **2013**, 73 (3), 457–464. <https://doi.org/10.1016/j.reactfunctpolym.2012.11.017>.
- (9) Ozan Aydin, G.; Bulbul Sonmez, H. Hydrophobic Poly(Alkoxysilane) Organogels as Sorbent Material for Oil Spill Cleanup. *Mar. Pollut. Bull.* **2015**, 96 (1), 155–164. <https://doi.org/10.1016/j.marpolbul.2015.05.033>.
- (10) Zhang, Y.; Wei, S.; Liu, F.; Du, Y.; Liu, S.; Ji, Y.; Yokoi, T.; Tatsumi, T.; Xiao, F.-S. Superhydrophobic Nanoporous Polymers as Efficient Adsorbents for Organic Compounds. *Nano Today* **2009**, 4 (2), 135–142. <https://doi.org/10.1016/j.nantod.2009.02.010>.
- (11) Ruan, C.; Ai, K.; Li, X.; Lu, L. A Superhydrophobic Sponge with Excellent Absorbency and Flame Retardancy. *Angew. Chem. Int. Ed.* **2014**, 53 (22), 5556–5560. <https://doi.org/10.1002/anie.201400775>.
- (12) Ono, T.; Sugimoto, T.; Shinkai, S.; Sada, K. Molecular Design of Superabsorbent Polymers for Organic Solvents by Crosslinked Lipophilic Polyelectrolytes. *Adv. Funct. Mater.* **2008**, 18 (24), 3936–3940. <https://doi.org/10.1002/adfm.200801221>.
- (13) Raptopoulos, G.; Anyfantis, G. C.; Chriti, D.; Paraskevopoulou, P. Synthesis and Structural Characterization of Poly(Dicyclopentadiene) Gels Obtained with a Novel Ditungsten versus Conventional W and Ru Mononuclear Catalysts. *Inorganica Chim. Acta* **2017**, 460, 69–76. <https://doi.org/10.1016/j.ica.2016.09.008>.
- (14) Atta, A. M.; Brostow, W.; Datashvili, T.; El-Ghazawy, R. A.; Lobland, H. E. H.; Hasan, A.-R. M.; Perez, J. M. Porous Polyurethane Foams Based on Recycled Poly(Ethylene Terephthalate) for Oil Sorption: Polyurethane Foams for Oil Sorption. *Polym. Int.* **2013**, 62 (1), 116–126. <https://doi.org/10.1002/pi.4325>.
- (15) Bang, A.; Mohite, D.; Saeed, A. M.; Leventis, N.; Sotiriou-Leventis, C. Polydicyclopentadiene Aerogels from First- versus Second-Generation Grubbs' Catalysts: A Molecular versus a Nanoscopic Perspective. *J. Sol-Gel Sci. Technol.* **2015**, 75 (2), 460–474. <https://doi.org/10.1007/s10971-015-3718-0>.
- (16) Long, T. R.; Gupta, A.; Li, A. L. M.; Rethwisch, D. G.; Bowden, N. B. Selective Flux of Organic Liquids and Solids Using Nanoporous Membranes of Polydicyclopentadiene. *J. Mater. Chem.* **2011**, 21 (37), 14265–14276. <https://doi.org/10.1039/C1JM10970G>.
- (17) Sarapas, J. M.; Chan, E. P.; Rettner, E. M.; Beers, K. L. Compressing and Swelling To Study the Structure of Extremely Soft Bottlebrush Networks Prepared by ROMP. *Macromolecules* **2018**, 51 (6), 2359–2366. <https://doi.org/10.1021/acs.macromol.8b00018>.
- (18) Gui, X.; Wei, J.; Wang, K.; Cao, A.; Zhu, H.; Jia, Y.; Shu, Q.; Wu, D. Carbon Nanotube Sponges. *Adv. Mater.* **2010**, 22 (5), 617–621. <https://doi.org/10.1002/adma.200902986>.
- (19) Qian, Y.; Ismail, I. M.; Stein, A. Ultralight, High-Surface-Area, Multifunctional Graphene-Based Aerogels from Self-Assembly of Graphene Oxide and Resol. *Carbon* **2014**, 68, 221–231. <https://doi.org/10.1016/j.carbon.2013.10.082>.
- (20) Sun, H.; Xu, Z.; Gao, C. Multifunctional, Ultra-Flyweight, Synergistically Assembled Carbon Aerogels. *Adv. Mater.* **2013**, 25 (18), 2554–2560. <https://doi.org/10.1002/adma.201204576>.

- (21) Zhao, Y.; Hu, C.; Hu, Y.; Cheng, H.; Shi, G.; Qu, L. A Versatile, Ultralight, Nitrogen-Doped Graphene Framework. *Angew. Chem. Int. Ed.* **2012**, *51* (45), 11371–11375. <https://doi.org/10.1002/anie.201206554>.
- (22) Bi, H.; Xie, X.; Yin, K.; Zhou, Y.; Wan, S.; He, L.; Xu, F.; Banhart, F.; Sun, L.; Ruoff, R. S. Spongy Graphene as a Highly Efficient and Recyclable Sorbent for Oils and Organic Solvents. *Adv. Funct. Mater.* **2012**, *22* (21), 4421–4425. <https://doi.org/10.1002/adfm.201200888>.
- (23) Cong, H.-P.; Ren, X.-C.; Wang, P.; Yu, S.-H. Macroscopic Multifunctional Graphene-Based Hydrogels and Aerogels by a Metal Ion Induced Self-Assembly Process. *ACS Nano* **2012**, *6* (3), 2693–2703. <https://doi.org/10.1021/nn300082k>.
- (24) Hansen Solubility Parameters | Hansen Solubility Parameters <https://www.hansen-solubility.com/> (accessed Mar 4, 2019).
